# Supplementary material
Source: publisher site journal article supplement (https://www.spandidos-publications.com/3616/downloadSupplementary)
Supplement: Supplementary file 1 [file downloadSupplementary]

## Sheet: Supplementary table I
Table SI. 106 common risk colorectal cancer variants.
rs_ID	Chr	POS	REF allele	ALT allele
rs10152518	chr15	67884824	G	A
rs10161980	chr13	33519381	C	G
rs1035209	chr10	99585609	C	T
rs10411210	chr19	33041394	C	T
rs10774214	chr12	4259186	T	C
rs1078643	chr17	10803924	G	A
rs10795668	chr10	8659256	G	A
rs10849432	chr12	6276561	C	T
rs10849438	chr12	6302870	T	G
rs10904849	chr10	16955267	G	T
rs10911251	chr1	183112059	A	C
rs10936599	chr3	169774313	C	T
rs10951878	chr7	46887097	C	T
rs10994860	chr10	50885664	C	T
rs11196172	chr10	112967084	G	A
rs113569514	chr3	134029945	T	C
rs11632715	chr15	32712046	G	A
rs11692435	chr2	97658891	G	A
rs11893063	chr2	198737201	G	A
rs12143541	chr1	54782179	A	G
rs12241008	chr10	112520943	T	C
rs12255141	chr10	112535133	A	G
rs12427600	chr13	36886511	T	C
rs12659017	chr5	126652483	G	A
rs12979278	chr19	48715345	C	T
rs1321311	chr6	36655123	C	A
rs1370821	chr4	94022232	C	T
rs13831	chr20	58900136	A	G
rs1412834	chr9	22110132	T	C
rs1476570	chr6	29842083	G	A
rs1535	chr11	61830500	A	G
rs16892766	chr8	116618444	A	C
rs16969681	chr15	32700910	C	T
rs17035289	chr4	105127134	T	C
rs174537	chr11	61785208	G	T
rs174550	chr11	61804006	T	C
rs1800469	chr19	41354391	A	G
rs1886450	chr13	73412491	A	G
rs1957636	chr14	54093300	T	C
rs2070699	chr6	12292539	G	T
rs2179593	chr20	44031646	C	A
rs2241714	chr19	41363487	T	C
rs2295444	chr20	34586079	C	T
rs2423279	chr20	7831703	T	C
rs2450115	chr8	116611854	T	C
rs2696839	chr16	86306842	G	C
rs2730985	chr12	42736822	A	G
rs2735940	chr5	1296371	A	G
rs285245	chr19	16310006	C	T
rs2853668	chr5	1299910	G	T
rs3131043	chr6	30790689	A	G
rs3217810	chr12	4279105	C	T
rs35360328	chr3	40883471	T	A
rs35509282	chr4	162412253	T	A
rs3787089	chr20	63685277	C	T
rs3801081	chr7	47471563	A	G
rs3802842	chr11	111300984	C	A
rs3824999	chr11	74634505	T	G
rs3830041	chr6	32223562	C	T
rs4246215	chr11	61796827	G	T
rs4341754	chr16	80005724	G	C
rs4444235	chr14	53944201	T	C
rs45597035	chr13	73075014	A	G
rs4711689	chr6	41725074	G	A
rs4776316	chr15	66715475	A	G
rs4779584	chr15	32702555	T	C
rs4813802	chr20	6718948	T	G
rs4919687	chr10	102835491	G	A
rs4925386	chr20	62345988	T	C
rs4939827	chr18	48927093	T	C
rs58791712	chr5	40281695	G	GT
rs5934683	chrX	9783434	T	C
rs6055286	chr20	7737398	A	G
rs6066825	chr20	48723580	A	G
rs61336918	chr16	79973369	A	T
rs61776719	chr1	37995647	C	A
rs62404968	chr6	55849516	C	T
rs639933	chr5	135132061	C	A
rs6469656	chr8	116635549	G	A
rs647161	chr5	135163402	C	A
rs6584283	chr10	99530544	T	C
rs6687758	chr1	221991606	A	G
rs6691170	chr1	221872104	G	T
rs6906359	chr6	35560601	C	T
rs6928864	chr6	105519019	C	A
rs6933790	chr6	41705031	T	C
rs6983267	chr8	127401060	G	T
rs704017	chr10	79059375	A	G
rs7136702	chr12	50486433	T	C
rs72013726	chr12	115453030	CACAA	C
rs7229639	chr18	48924606	A	G
rs7252505	chr19	33084158	G	A
rs73975588	chr17	913501	A	C
rs7398375	chr12	57147065	C	G
rs7495132	chr15	90629669	C	T
rs7542665	chr1	62207365	T	C
rs75686861	chr4	144700176	G	A
rs7593422	chr2	199266972	A	T
rs7606562	chr2	48459556	T	A
rs7993934	chr13	110422568	C	T
rs8124813	chr20	43476841	A	G
rs9271770	chr6	32626471	G	A
rs961253	chr20	6423634	C	A
rs9797885	chr19	41367096	A	G
rs9831861	chr3	53054269	T	G
rs9929218	chr16	68787043	G	A
Chr, chromosome; POS, position; REF, reference; ALT, alternative.

## Sheet: Supplementary table II
Table SII. Allele frequencies of 106 common risk colorectal cancer variants in Slovak population and six world populations.
rs_ID	Chr	POS	REF allele	ALT allele	Allele frequency in population
					African	American	East Asian	European (Finnish)	European (non-Finnish)	South Asian	Slovak
rs61776719	chr1	37995647	C	A	0.291093	0.442208	0.33644	0.580966	0.553773	0.435634	0.564
rs12143541	chr1	54782179	A	G	0.0485206	0.0925465	0.0185185	0.11501	0.152779	0.0781353	0.1564
rs7542665	chr1	62207365	T	C	0.682345	0.64671	0.335362	0.675862	0.679368	0.571146	0.6844
rs10911251	chr1	183112059	A	C	0.207408	0.399149	0.485614	0.50048	0.433662	0.462252	0.391
rs6691170	chr1	221872104	G	T	0.338086	0.263092	0.00127796	0.374544	0.364862	0.27431	0.4072
rs6687758	chr1	221991606	A	G	0.188236	0.234487	0.199296	0.265607	0.197921	0.157687	0.1855
rs7606562	chr2	48459556	T	A	0.46367	0.380484	0.19821	0.302341	0.34527	0.463487	0.3387
rs11692435	chr2	97658891	G	A	0.0124441	0.0421245	0	0.245769	0.0860915	0.0154809	0.1223
rs11893063	chr2	198737201	G	A	0.142365	0.43812	0.366302	0.587655	0.459848	0.277888	0.4348
rs7593422	chr2	199266972	A	T	0.147609	0.432321	0.370679	0.613061	0.53444	0.412016	0.5839
rs35360328	chr3	40883471	T	A	0.026093	0.0888466	0.070836	0.203356	0.152215	0.101249	0.1545
rs9831861	chr3	53054269	T	G	0.431371	0.529187	0.355035	0.612931	0.584854	0.368404	0.6172
rs113569514	chr3	134029945	T	C	0.355451	0.242082	0.413937	0.187356	0.141266	0.217991	0.1588
rs10936599	chr3	169774313	C	T	0.0673823	0.314095	0.543798	0.264661	0.245174	0.269711	0.3031
rs1370821	chr4	94022232	C	T	0.119394	0.295878	0.328005	0.384232	0.406262	0.270244	0.4263
rs17035289	chr4	105127134	T	C	0.371532	0.217924	0.17433	0.284838	0.171455	0.250329	0.1776
rs75686861	chr4	144700176	G	A	0.0167191	0.0538281	0.00063857	0.0877328	0.0932532	0.0148908	0.0863
rs35509282	chr4	162412253	T	A	0.17	0.212585	0.412653	0.16497	0.110722	0.206987	0.0861
rs2735940	chr5	1296371	A	G	0.472059	0.587778	0.508659	0.531178	0.490762	0.345801	0.5138
rs2853668	chr5	1299910	G	T	0.499188	0.270568	0.304933	0.234495	0.250372	0.315425	0.2325
rs397775554	chr5	40281695	G	GT	0.0965136	0.230207	0.0477583	0.205935	0.283687	0.130682	0.169
rs12659017	chr5	126652483	G	A	0.237762	0.284665	0.722222	0.290819	0.246519	0.470336	0.1984
rs639933	chr5	135132061	C	A	0.902038	0.606933	0.6161	0.5024	0.636571	0.520341	0.6547
rs647161	chr5	135163402	C	A	0.563114	0.633998	0.344651	0.692742	0.670512	0.622361	0.6882
rs2070699	chr6	12292539	G	T	0.0984524	0.447927	0.543242	0.557685	0.461921	0.403088	0.5061
rs1476570	chr6	29842083	G	A	0.547262	0.464401	0.303273	0.209625	0.260578	0.341238	0.2615
rs3131043	chr6	30790689	A	G	0.400167	0.567611	0.49391	0.28462	0.427747	0.667655	0.5556
rs3830041	chr6	32223562	C	T	0.173688	0.099516	0.119461	0.0239824	0.0856483	0.105592	0.1211
rs9271770	chr6	32626471	G	A	0.665853	0.805813	0.705045	0.744206	0.807967	0.711361	0.8069
rs6906359	chr6	35560601	C	T	0.134581	0.150478	0.0658568	0.0545315	0.116695	0.0626236	0.0521
rs1321311	chr6	36655123	C	A	0.393642	0.237147	0.179233	0.192639	0.240865	0.312829	0.2426
rs6933790	chr6	41705031	T	C	0.0955091	0.190166	0.37532	0.180601	0.178443	0.231427	0.1768
rs4711689	chr6	41725074	G	A	0.888825	0.652731	0.815453	0.529854	0.567656	0.752131	0.5798
rs62404968	chr6	55849516	C	T	0.0995088	0.142015	0.0418263	0.24721	0.249216	0.180171	0.1984
rs6928864	chr6	105519019	C	A	0.627927	0.133544	0.0504148	0.11667	0.0963493	0.234211	0.1006
rs10951878	chr7	46887097	C	T	0.659082	0.629583	0.454575	0.567824	0.510601	0.509533	0.4728
rs3801081	chr7	47471563	A	G	0.645216	0.721775	0.868051	0.748756	0.670215	0.823491	0.6667
rs2450115	chr8	116611854	T	C	0.180046	0.241081	0.447537	0.141131	0.176636	0.252961	0.2146
rs16892766	chr8	116618444	A	C	0.126315	0.0583407	0.000320924	0.117703	0.0778704	0.0871711	0.0703
rs6469656	chr8	116635549	G	A	0.831288	0.811308	0.68842	0.880364	0.883443	0.825297	0.8664
rs6983267	chr8	127401060	G	T	0.107949	0.444444	0.590938	0.473336	0.490391	0.503607	0.4938
rs1412834	chr9	22110132	T	C	0.892547	0.612221	0.670186	0.431683	0.521135	0.629605	0.5163
rs10795668	chr10	8659256	G	A	0.0616993	0.314271	0.356318	0.291227	0.320626	0.263816	0.3004
rs10904849	chr10	16955267	G	T	0.118177	0.199007	0.152482	0.369839	0.326186	0.264529	0.2051
rs10994860	chr10	50885664	C	T	0.208433	0.12777	0.0462963	0.279403	0.175442	0.223719	0.1356
rs704017	chr10	79059375	A	G	0.520928	0.426579	0.275497	0.689215	0.577596	0.449671	0.5808
rs6584283	chr10	99530544	T	C	0.614137	0.586166	0.541987	0.529706	0.535145	0.635974	0.5885
rs1035209	chr10	99585609	C	T	0.0878378	0.11256	0.175736	0.154958	0.189938	0.108126	0.1968
rs4919687	chr10	102835491	G	A	0.167953	0.234043	0.240895	0.264706	0.299634	0.129106	0.2373
rs12241008	chr10	112520943	T	C	0.200673	0.0752356	0.278384	0.107163	0.0944441	0.224704	0.1045
rs12255141	chr10	112535133	A	G	0.201355	0.0765792	0.266325	0.107683	0.0956158	0.222479	0.1256
rs11196172	chr10	112967084	G	A	0.0680293	0.154083	0.658435	0.123349	0.130592	0.297635	0.1442
rs174537	chr11	61785208	G	T	0.0855721	0.485275	0.585045	0.419973	0.336088	0.198225	0.3067
rs4246215	chr11	61796827	G	T	0.0836348	0.487538	0.585358	0.447515	0.349329	0.186965	0.0625
rs174550	chr11	61804006	T	C	0.0810759	0.485029	0.585256	0.419854	0.336962	0.180171	0.2817
rs1535	chr11	61830500	A	G	0.155037	0.498753	0.584881	0.419308	0.339517	0.18134	0.3023
rs3824999	chr11	74634505	T	G	0.17816	0.406548	0.398657	0.490017	0.510591	0.347067	0.5193
rs3802842	chr11	111300984	C	A	0.65466	0.776728	0.581836	0.774104	0.716278	0.823471	0.7634
rs10774214	chr12	4259186	T	C	0.369521	0.578249	0.685458	0.508963	0.623834	0.684089	0.6065
rs3217810	chr12	4279105	C	T	0.0222101	0.0777062	0.00607029	0.161451	0.1244	0.0798153	0.1337
rs10849432	chr12	6276561	C	T	0.721314	0.835461	0.793798	0.924503	0.892659	0.963109	0.8717
rs10849438	chr12	6302870	T	G	0.0246444	0.124798	0.290757	0.144691	0.117311	0.251808	0.1288
rs2730985	chr12	42736822	A	G	0.384656	0.591016	0.598392	0.416379	0.503721	0.333443	0.5461
rs7136702	chr12	50486433	T	C	0.405433	0.61696	0.564952	0.719816	0.652748	0.472643	0.7048
rs7398375	chr12	57147065	C	G	0.172955	0.266114	0.524711	0.331731	0.277636	0.366579	0.3028
rs10559083	chr12	115453030	CACAA	C	0.614273	0.39293	0.337068	0.660285	0.523443	0.46737	0.5
rs10161980	chr13	33519381	C	G	0.337927	0.343351	0.292083	0.304222	0.37832	0.375	0.3869
rs12427600	chr13	36886511	T	C	0.259014	0.20151	0.0994882	0.254926	0.234078	0.172357	0.1925
rs45597035	chr13	73075014	A	G	0.115652	0.231446	0.149745	0.501257	0.359394	0.190257	0.4123
rs1886450	chr13	73412491	A	G	0.492766	0.754296	0.523323	0.798694	0.707134	0.681579	0.7297
rs7993934	chr13	110422568	C	T	0.357187	0.673136	0.772669	0.671941	0.633248	0.621471	0.6429
rs4444235	chr14	53944201	T	C	0.334699	0.483072	0.489757	0.416555	0.46107	0.513825	0.4357
rs1957636	chr14	54093300	T	C	0.245084	0.512138	0.331511	0.572224	0.601709	0.442282	0.6317
rs16969681	chr15	32700910	C	T	0.127169	0.141159	0.371795	0.0907347	0.0856753	0.234211	0.0932
rs4779584	chr15	32702555	T	C	0.449895	0.736885	0.190019	0.715588	0.806416	0.599869	0.7619
rs11632715	chr15	32712046	G	A	0.371069	0.531038	0.776958	0.566797	0.477437	0.650371	0.5034
rs4776316	chr15	66715475	A	G	0.243823	0.209042	0.102302	0.23391	0.288169	0.225115	0.3047
rs10152518	chr15	67884824	G	A	0.473736	0.69937	0.655691	0.75196	0.809582	0.739645	0.8031
rs7495132	chr15	90629669	C	T	0.163824	0.0764895	0.200576	0.101896	0.110894	0.158793	0.1071
rs9929218	chr16	68787043	G	A	0.296524	0.255906	0.216667	0.24078	0.289313	0.253127	0.2997
rs61336918	chr16	79973369	A	T	0.474637	0.759888	0.579049	0.731186	0.71753	0.71037	0.7546
rs4341754	chr16	80005724	G	C	0.211418	0.452545	0.439949	0.468666	0.566947	0.516108	0.5458
rs2696839	chr16	86306842	G	C	0.331568	0.386257	0.273894	0.369381	0.50124	0.33476	0.4955
rs73975588	chr17	913501	A	C	0.0427111	0.0926876	0.00127796	0.151243	0.129648	0.120724	0.1393
rs1078643	chr17	10803924	G	A	0.382801	0.631169	0.728059	0.791028	0.760828	0.508905	0.7273
rs7229639	chr18	48924606	A	G	0.805996	0.864029	0.840371	0.865469	0.90687	0.936842	0.931
rs4939827	chr18	48927093	T	C	0.68554	0.621183	0.689974	0.530687	0.485346	0.707373	0.47
rs285245	chr19	16310006	C	T	0.229705	0.112564	0.00358073	0.0700106	0.111325	0.0898123	0.0692
rs10411210	chr19	33041394	C	T	0.424293	0.158624	0.189258	0.147155	0.102379	0.347569	0.1284
rs7252505	chr19	33084158	G	A	0.666508	0.174318	0.155769	0.144129	0.0986924	0.343627	0.1359
rs1800469	chr19	41354391	A	G	0.762149	0.571617	0.438383	0.743158	0.689681	0.619314	0.6882
rs2241714	chr19	41363487	T	C	0.831614	0.578185	0.436538	0.716237	0.685174	0.609901	0.6289
rs9797885	chr19	41367096	A	G	0.831364	0.577792	0.438466	0.715874	0.685653	0.610053	0.6432
rs12979278	chr19	48715345	C	T	0.245102	0.370894	0.0167203	0.424749	0.519563	0.261714	0.4326
rs961253	chr20	6423634	C	A	0.34967	0.306127	0.0856777	0.289469	0.352864	0.318511	0.349
rs4813802	chr20	6718948	T	G	0.12463	0.349465	0.254161	0.324524	0.350443	0.444921	0.2941
rs6055286	chr20	7737398	A	G	0.928653	0.870676	0.832157	0.850578	0.855969	0.842209	0.8488
rs2423279	chr20	7831703	T	C	0.352645	0.307123	0.324056	0.203881	0.246931	0.489159	0.2695
rs2295444	chr20	34586079	C	T	0.340627	0.365077	0.409353	0.576901	0.498868	0.430171	0.4809
rs8124813	chr20	43476841	A	G	0.0638126	0.215616	0.117402	0.307213	0.34783	0.153846	0.3961
rs2179593	chr20	44031646	C	A	0.691476	0.686214	0.797055	0.733795	0.717685	0.573776	0.7527
rs6066825	chr20	48723580	A	G	0.699533	0.472862	0.282051	0.251487	0.361233	0.537574	0.3333
rs13831	chr20	58900136	A	G	0.923125	0.727686	0.728379	0.696806	0.701265	0.763989	0.685
rs4925386	chr20	62345988	T	C	0.252717	0.638808	0.747439	0.674017	0.692357	0.600066	0.6948
rs3787089	chr20	63685277	C	T	0.739723	0.693717	0.284843	0.731096	0.688244	0.664032	0.693
rs5934683	chrX	9783434	T	C	0.26556	0.446634	0.176254	0.584298	0.659085	0.399064	0.6536
Chr, chromosome; POS, position; REF, reference; ALT, alternative.

## Sheet: Supplementary table III
Table SIII. Allele frequencies of 648 variants identified in Slovak population and six world populations.
rs_ID	Chr	POS	REF allele	ALT allele	Allele frequency in population
					African	American	East Asian	European (Finnish)	European (non-Finnish)	South Asian	Slovak
rs4608576	2	47346431	C	T	0.345615	0.15842	0.166026	0.150192	0.109773	0.118766	0.0719
rs10439428	2	47346929	C	T	0.585848	0.324191	0.481719	0.377716	0.236198	0.343853	0.2301
rs55941733	2	47348413	G	T	0.815398	0.487695	0.717012	0.586257	0.425858	0.529352	0.4613
rs112874727	2	47348613	A	G	0.823688	0.488044	0.719298	0.57107	0.436503	0.542917	0.3931
rs72808419	2	47349364	C	A	0.096715	0.112164	0.137997	0.0818966	0.0667917	0.0966359	0.0792
rs11883630	2	47350817	T	A	0.467525	0.199453	0.189311	0.165248	0.1498	0.170439	0.121
rs77404994	2	47350888	G	A	0.0266772	0.144723	0.188466	0.153435	0.13064	0.0838881	0.1152
rs116640994	2	47350891	C	G	0.0142727	0.057307	0.000640205	0.108864	0.0834627	0.0142668	0.0632
rs11382002	2	47351205	T	TG	0.847003	0.49511	0.831833	0.585576	0.421503	0.51496	0.4225
rs79850147	2	47351329	C	G	0.0173289	0.0589985	0.00069979	0.122312	0.085811	0.0142637	0.1264
rs62138456	2	47352558	A	G	0.301727	0.222255	0.405379	0.318217	0.160735	0.249169	0.122
rs72808422	2	47355553	A	T	0.0642963	0.103308	0.23674	0.0968804	0.0679447	0.110446	0.0728
rs6726678	2	47355562	A	T	0.736569	0.477993	0.820554	0.584121	0.427692	0.520333	0.4642
rs4073491	2	47359998	G	A	0.692695	0.452441	0.742288	0.545004	0.375392	0.442715	0.3614
rs4614976	2	47362931	T	C	0.584924	0.336759	0.583815	0.39801	0.303605	0.341739	0.2895
rs4550710	2	47363136	T	C	0.622227	0.376852	0.586688	0.490057	0.365424	0.370333	0.205
rs113804803	2	47363251	T	G	0.0222116	0.0786401	0.000640615	0.147408	0.128522	0.0463816	0.1634
rs12986965	2	47364565	C	T	0.0289869	0.0593896	0.218223	0.10012	0.0934465	0.100736	0.0883
rs143819382	2	47364632	A	C	0.0269533	0.0742874	0.000641026	0.103699	0.08172	0.0584329	0.0696
rs12992458	2	47364988	A	G	0.79818	0.48964	0.826812	0.588835	0.435284	0.471466	0.2912
rs74179082	2	47365596	C	G	0.232495	0.149288	0.415714	0.0903259	0.0921569	0.122591	0.0687
rs4952885	2	47366385	G	A	0.740842	0.478659	0.741379	0.592656	0.407325	0.464507	0.2381
rs149656754	2	47367878	G	A	0.125579	0.104173	0.236791	0.0953206	0.0456984	0.0924951	0.0564
rs62139665	2	47368571	C	G	0.817297	0.481544	0.827774	0.588304	0.431402	0.485382	0.3141
rs60417954	2	47370612	A	G	0.345381	0.155929	0.248364	0.162387	0.0976455	0.133701	0.0521
rs10173799	2	47372415	G	A	0.762744	0.473435	0.827985	0.584578	0.413089	0.492691	0.4291
rs143258058	2	47372559	G	T	0.00540888	0.0101996	0	0.0354406	0.033882	0.00689882	0.0539
rs56368712	2	47372663	T	A	0.0665936	0.104868	0.243261	0.100365	0.0712226	0.116986	0.0849
rs10197484	2	47372702	A	G	0.399455	0.313812	0.579253	0.398984	0.299478	0.332887	0.2683
rs4399765	2	47374118	T	C	0.0886206	0.115407	0.252888	0.158011	0.109753	0.124588	0.1168
rs55931899	2	47374268	A	G	0.184682	0.127535	0.250481	0.158441	0.110593	0.123929	0.1453
rs66617176	2	47375650	A	G	0.274758	0.133838	0.251282	0.156467	0.109558	0.127708	0.0975
rs28609437	2	47377958	C	T	0.219325	0.247832	0.575496	0.378269	0.269156	0.266645	0.2757
rs3923560	2	47379544	T	C	0.142704	0.102056	0.245507	0.100402	0.071829	0.121631	0.068
rs13025438	2	47380876	A	G	0.390691	0.275577	0.575563	0.386501	0.276024	0.320547	0.1943
rs397958865	2	47381026	T	TAGTG	0.0279515	0.164906	0.182724	0.164365	0.133673	0.064539	0.1102
rs79411522	2	47381993	C	T	0.0263083	0.144043	0.180769	0.149404	0.131688	0.0660066	0.19
rs12996444	2	47383569	C	G	0.361184	0.298899	0.572512	0.449367	0.275502	0.305282	0.2895
rs10195858	2	47384029	G	T	0.343177	0.259552	0.570922	0.371534	0.260224	0.301787	0.2989
rs7581007	2	47384482	C	T	0.346034	0.265238	0.566602	0.386152	0.271927	0.306901	0.2469
rs1207230861	2	47405446	G	A	0.00128415	0.00139665	0.00295508	0.00312744	0.00216757	0.00320171	0.0724
rs114188719	2	47405881	T	C	0.108267	0.108957	0.140475	0.147245	0.0791048	0.0898618	0.0628
rs6544987	2	47407424	C	A	0.844268	0.477709	0.80199	0.577801	0.394587	0.471729	0.3644
rs62139710	2	47407560	A	G	0.0085649	0.0639202	0.000638162	0.0437404	0.043287	0.0527869	0.0505
rs17217758	2	47409926	C	T	0.0224301	0.0781388	0.00223785	0.152081	0.130914	0.0535007	0.0582
rs6715307	2	47410874	C	G	0.467721	0.298393	0.664189	0.457584	0.288812	0.325605	0.2471
rs10209586	2	47411656	A	G	0.738262	0.492763	0.817715	0.624491	0.445719	0.553571	0.3534
rs150470483	2	47412732	T	G	0.0779174	0.0875719	0.132391	0.0877535	0.0411199	0.0845443	0.0529
rs879472527	2	47414607	CT	C	0.000911689	0.0012382	0.000648929	0.00314748	0.000447771	0	0.0609
rs72884648	2	47415041	G	T	0.169289	0.0794496	0.0195638	0.141279	0.122862	0.116711	0.0693
rs114026303	2	47415211	A	G	0.0125222	0.0418354	0.0184458	0.07389	0.0680175	0.0765683	0.0574
rs11691516	2	47416052	C	G	0.811347	0.499486	0.821839	0.623561	0.445004	0.557237	0.4797
rs17224304	2	47417172	C	T	0.0107656	0.0294554	0.0144323	0.0513572	0.0631	0.076769	0.0615
rs10191478	2	47418110	G	T	0.799152	0.491035	0.818938	0.609135	0.437992	0.53616	0.4386
rs111472231	2	47420699	C	T	0.0301449	0.0795237	0.000639795	0.151185	0.131394	0.0556287	0.1268
rs147705523	2	47420759	C	G	0.0128693	0.030452	0.0127632	0.0511766	0.0636887	0.0778581	0.0712
rs7584126	2	47420838	G	A	0.849316	0.50103	0.819961	0.623173	0.440759	0.550691	0.2222
rs34808139	2	47422650	CA	C	0.368381	0.25089	0.167504	0.281018	0.194328	0.257517	0.0921
rs11889077	2	47424109	T	C	0.774354	0.413569	0.706996	0.532193	0.400127	0.465415	0.3913
rs62139718	2	47425431	G	A	0.188339	0.0781273	0.019821	0.142276	0.123915	0.122208	0.0736
rs2081486	2	47426144	T	A	0.758743	0.518919	0.728925	0.560422	0.45891	0.573819	0.3625
rs2081485	2	47426221	T	C	0.77117	0.417612	0.701403	0.534491	0.405937	0.471831	0.2011
rs2081484	2	47426360	G	A	0.765541	0.407194	0.696406	0.529981	0.392712	0.457313	0.25
rs2081483	2	47426506	C	T	0.598952	0.307704	0.674664	0.44688	0.30318	0.32959	0.3347
rs62139719	2	47426530	C	T	0.0247904	0.0842036	0.0127877	0.0832216	0.0884522	0.124589	0.0535
rs13019133	2	47427194	A	G	0.0304472	0.16789	0.522989	0.100842	0.100375	0.157912	0.1055
rs142392501	2	47427551	T	G	0.0141967	0.0312179	0.0127877	0.0515099	0.0641419	0.0781662	0.0669
rs6741139	2	47427646	G	T	0.651412	0.39498	0.688383	0.52844	0.389399	0.44657	0.3257
rs11125136	2	47428327	A	G	0.686229	0.392886	0.696879	0.512314	0.394181	0.442029	0.3657
rs6753135	2	47430545	G	A	0.11647	0.073051	0.0188378	0.141546	0.124078	0.122456	0.1026
rs17217989	2	47430576	A	T	0.0756674	0.0534877	0.018874	0.0821224	0.0855903	0.115309	0.0767
rs10173171	2	47431946	G	A	0.272406	0.0478474	0.11443	0.0262186	0.0468722	0.0752365	0.2324
rs72884696	2	47435233	G	A	0.0455783	0.0645258	0.0128205	0.141873	0.122692	0.117099	0.0827
rs7593412	2	47435589	A	G	0.732439	0.45337	0.698069	0.569649	0.408407	0.469866	0.1804
rs113220832	2	47435647	G	T	0.0227704	0.047073	0.0115607	0.0831306	0.0852964	0.108927	0.0783
rs11894352	2	47438480	T	G	0.313607	0.199574	0.501921	0.101376	0.10049	0.171148	0.1346
rs13408008	2	47438558	T	G	0.0558782	0.0829672	0.000638162	0.151054	0.132602	0.0578187	0.1311
rs7575871	2	47439253	T	C	0.778894	0.416777	0.698464	0.534776	0.403231	0.474206	0.3311
rs7588420	2	47439495	A	G	0.655411	0.34193	0.679372	0.391532	0.279104	0.346561	0.2974
rs17036577	2	47439699	T	C	0.0997425	0.0560775	0.018874	0.0813374	0.0860353	0.113487	0.0548
rs1981927	2	47440990	G	A	0.768836	0.41576	0.6966	0.534592	0.402095	0.471873	0.2946
rs6719539	2	47441830	G	C	0.779905	0.420269	0.704633	0.54108	0.402851	0.470706	0.3024
rs6726691	2	47443165	G	C	0.492886	0.322137	0.679233	0.391213	0.277097	0.347855	0.2707
rs6726832	2	47443251	G	A	0.777743	0.416765	0.697047	0.534718	0.402456	0.471382	0.3716
rs7607312	2	47444603	A	C	0.779394	0.417268	0.714606	0.535632	0.405065	0.479263	0.4385
rs6739590	2	47446921	G	C	0.778995	0.415157	0.701923	0.534157	0.401254	0.469767	0.376
rs2347795	2	47447696	C	A	0.778305	0.415511	0.706298	0.530119	0.40013	0.469577	0.386
rs4596025	2	47447735	G	T	0.777049	0.413642	0.699229	0.52743	0.40004	0.47012	0.3142
rs7601652	2	47447988	A	G	0.976843	0.920883	1	0.925322	0.883867	0.975706	0.84
rs12712993	2	47448989	G	C	0.775795	0.408942	0.700068	0.517299	0.403673	0.455378	0.3707
rs10194410	2	47449027	C	A	0.368721	0.104384	0.387097	0.11912	0.148143	0.282895	0.259
rs62140863	2	47450430	A	T	0.0261391	0.045961	0.0105431	0.0820268	0.0896387	0.111404	0.069
rs6704794	2	47450480	A	G	0.729508	0.408984	0.702251	0.530431	0.404707	0.473893	0.1755
rs1402994488	2	47450830	CA	C	0.000173345	0.000388923	0	0.0015667	0.000612725	0	0.0603
rs10680265	2	47451686	T	TCTC	0.887742	0.672941	0.890534	0.588763	0.527912	0.675462	0.5785
rs10680265	2	47451686	T	TTTC	0.0290606	0.0795004	0.000643087	0.151454	0.13203	0.0533597	0.1166
rs71399031	2	47452213	C	CT	0.359479	0.190927	0.401239	0.24491	0.19024	0.216271	0.0503
rs13425436	2	47452222	C	T	0.0142456	0.0167769	0	0.0523388	0.0373083	0.00838192	0.0857
rs12615967	2	47452507	A	G	0.135335	0.0746039	0.0188619	0.140924	0.122248	0.122784	0.0814
rs397706237	2	47452946	GCA	G	0.689023	0.40726	0.697165	0.52936	0.399966	0.469144	0.228
rs6707467	2	47454351	T	C	0.779064	0.418212	0.70272	0.536629	0.400973	0.473916	0.3214
rs2162121	2	47456636	A	G	0.78995	0.422581	0.693145	0.536792	0.426453	0.477975	0.4233
rs6758327	2	47456719	C	T	0.780045	0.421107	0.691374	0.53436	0.426047	0.475066	0.3922
rs17224556	2	47457990	C	G	0.0481392	0.0552053	0.018874	0.0892275	0.113369	0.120303	0.0851
rs6724876	2	47458520	G	C	0.790033	0.422606	0.680564	0.532956	0.428003	0.47586	0.3621
rs149765795	2	47458571	C	T	0.110343	0.0394518	0.162716	0.138347	0.0411262	0.129913	0.0635
rs6725042	2	47458756	C	G	0.688361	0.346651	0.659936	0.389093	0.277828	0.346509	0.199
rs35139333	2	47458958	T	TA	0.333099	0.145754	0.242809	0.136773	0.123075	0.150568	0.1159
rs6757035	2	47459237	A	G	0.516986	0.325559	0.659472	0.388479	0.276495	0.346939	0.3275
rs10569898	2	47459501	TTTTA	T	0.486778	0.321182	0.654345	0.383975	0.275305	0.347424	0.194
rs12999145	2	47459547	A	G	0.0262779	0.167305	0.493557	0.101011	0.0982753	0.141628	0.0905
rs879270403	2	47459570	CT	C	0.000545987	0.000541209	0	0.00238854	0.000514023	0	0.0698
rs7586575	2	47461698	C	G	0.753398	0.395198	0.67651	0.50084	0.37804	0.428269	0.3462
rs6737303	2	47461880	C	T	0.620566	0.340847	0.662189	0.379775	0.278102	0.347232	0.3415
rs13019654	2	47462078	G	T	0.0346041	0.165213	0.25894	0.200613	0.14383	0.078614	0.1582
rs6711675	2	47462117	A	G	0.787322	0.421397	0.681347	0.540193	0.429326	0.477456	0.3917
rs6748435	2	47463981	G	A	0.588846	0.338935	0.669127	0.389392	0.277382	0.349274	0.317
rs397953372	2	47464519	T	TA	0.0318865	0.172543	0.52233	0.112676	0.102471	0.162236	0.09
rs10179452	2	47465493	T	C	0.492061	0.32102	0.663462	0.389284	0.277129	0.348355	0.2873
rs7565513	2	47466012	T	A	0.642687	0.368711	0.671355	0.443101	0.34192	0.418972	0.3043
rs6754473	2	47467173	T	C	0.742638	0.399793	0.688424	0.49357	0.384386	0.439747	0.3796
rs7596629	2	47469542	G	C	0.658109	0.388881	0.669769	0.501354	0.381724	0.428524	0.3193
rs10175959	2	47473251	G	A	0.763214	0.399619	0.694355	0.498847	0.378699	0.429888	0.3602
rs9808124	2	47474566	C	T	0.179111	0.187702	0.325016	0.287949	0.175519	0.183848	0.136
rs12232996	2	47474569	G	A	0.0223191	0.103537	0.347017	0.0991759	0.0989706	0.142338	0.0991
rs17218536	2	47478833	G	C	0.0275581	0.0333529	0.00991049	0.0536604	0.0682804	0.0710994	0.061
rs6544991	2	47485641	A	C	0.24354	0.212495	0.34485	0.302897	0.178228	0.194591	0.1949
rs4550716	2	47490768	C	A	0.779968	0.430913	0.706919	0.534726	0.398725	0.465209	0.3077
rs397869913	2	47491553	AC	A	0.397577	0.170713	0.530962	0.238413	0.144704	0.250529	0.1329
rs796644546	2	47491553	ACC	A	0.217778	0.113043	0.000657895	0.167266	0.143776	0.059817	0.1519
rs11297422	2	47491955	AT	A	0.778879	0.428802	0.700064	0.532672	0.402156	0.460344	0.3367
rs6544993	2	47496149	A	C	0.260209	0.199402	0.530779	0.103366	0.102643	0.185645	0.0936
rs75752731	2	47496354	T	G	0.018148	0.043794	0.0114869	0.105793	0.0936173	0.0812873	0.1183
rs868786609	2	47497553	T	G	0.0169669	0.0193654	0.00356448	0.0317347	0.0241994	0.0174061	0.062
rs77310289	2	47498073	C	T	0.0219346	0.0437106	0.0118135	0.105238	0.0930326	0.0803279	0.0637
rs10206575	2	47498703	C	T	0.667885	0.351122	0.671795	0.387527	0.286579	0.351289	0.272
rs10206782	2	47498894	C	A	0.506022	0.327829	0.659178	0.381104	0.277635	0.346535	0.2579
rs7599880	2	47500131	G	A	0.773934	0.401849	0.691864	0.499615	0.380177	0.433838	0.4069
rs74179087	2	47502683	A	G	0.0218024	0.0782398	0.000639386	0.149788	0.129137	0.0240606	0.1284
rs11677098	2	47507661	C	T	0.393398	0.28817	0.513809	0.249952	0.232381	0.224618	0.2458
rs13009248	2	47508922	C	G	0.0602817	0.248608	0.515995	0.251005	0.230984	0.204545	0.2415
rs72812322	2	47510029	C	G	0.0322865	0.109711	0.0514377	0.104836	0.154411	0.103947	0.1196
rs11901645	2	47510079	A	C	0.564096	0.378061	0.696417	0.487054	0.377034	0.431638	0.3934
rs11891189	2	47510259	C	G	0.240454	0.268988	0.515995	0.25067	0.231575	0.218565	0.2483
rs6746426	2	47511909	A	G	0.62494	0.381813	0.669579	0.494219	0.376715	0.431908	0.4397
rs6718364	2	47511914	G	A	0.770536	0.401794	0.669579	0.497784	0.380201	0.434826	0.4197
rs876936	2	47513059	G	T	0.774017	0.401202	0.671815	0.50278	0.383196	0.433906	0.3776
rs876937	2	47513427	T	C	0.604617	0.39449	0.674776	0.528087	0.394605	0.467434	0.3419
rs879722	2	47513877	G	C	0.597809	0.379128	0.684817	0.498172	0.371767	0.4281	0.3825
rs9784092	2	47514750	C	A	0.687109	0.393408	0.673201	0.501938	0.377212	0.427575	0.358
rs7587143	2	47516288	G	A	0.432697	0.321748	0.502561	0.306764	0.295421	0.29249	0.2955
rs2278139	2	47521153	A	G	0.777118	0.406089	0.68662	0.477911	0.391697	0.46875	0.3864
rs12612893	2	47526321	C	G	0.627744	0.362809	0.520415	0.32314	0.344242	0.358219	0.2653
rs11896864	2	47526531	A	G	0.794746	0.440728	0.691913	0.559704	0.431416	0.476943	0.3604
rs66551248	2	47526719	C	T	0.0953232	0.0946481	0.000638162	0.157019	0.156122	0.0569079	0.1577
rs10184441	2	47532003	T	C	0.999119	0.998535	0.999681	0.990718	0.994963	0.999671	0.973
rs7606984	2	47532059	C	A	0.740022	0.378392	0.68662	0.535385	0.405595	0.450528	0.3919
rs70940695	2	47532227	T	TA	0.658909	0.375656	0.54987	0.477718	0.373517	0.355681	0.2908
rs748780	2	47536756	T	C	0.763566	0.432845	0.70876	0.558547	0.42783	0.483213	0.4752
rs17036653	2	47539468	G	T	0.310916	0.12097	0.000639386	0.159222	0.164384	0.0663366	0.1911
rs13029485	2	47541647	C	T	0.0229828	0.0816716	0.00063857	0.14839	0.133788	0.0454545	0.1479
rs7575486	2	47542944	G	C	0.367976	0.271227	0.689898	0.255709	0.211215	0.362919	0.1847
rs6708696	2	47546401	A	G	0.911527	0.740844	0.889279	0.718049	0.630771	0.749506	0.6349
rs34388623	2	47546501	A	G	0.0291024	0.148688	0.197503	0.152972	0.135948	0.0640184	0.1805
rs17568609	2	47546821	G	A	0.0145749	0.0327809	0.00511182	0.059816	0.0812796	0.0762656	0.0744
rs79667778	2	47547405	T	C	0.211821	0.0785348	0.00542784	0.141531	0.129024	0.124425	0.1484
rs13420102	2	47547507	T	G	0.353598	0.207759	0.385109	0.238839	0.176997	0.182774	0.1573
rs202127179	2	47547590	CTTTA	C	0.0143566	0.0324761	0.00510856	0.0595557	0.0808454	0.073082	0.0562
rs6544995	2	47548920	G	A	0.485229	0.126924	0.16624	0.219727	0.160619	0.216172	0.1057
rs75242550	2	47550319	T	C	0.0149609	0.0362652	0.00802826	0.0849076	0.0877089	0.087217	0.0894
rs6736039	2	47550957	G	T	0.650511	0.378452	0.433441	0.493446	0.41049	0.390831	0.3892
rs34559328	2	47552588	T	C	0.427558	0.349655	0.206202	0.225667	0.150622	0.114012	0.1619
rs72812335	2	47553726	T	C	0.0758795	0.198109	0.196348	0.149292	0.15945	0.240435	0.1217
rs75581047	2	47554195	A	G	0.0453118	0.161978	0.193291	0.101146	0.0755126	0.131389	0.1117
rs76694230	2	47554279	C	T	0.0381318	0.0332747	0.18726	0.0931862	0.0560684	0.116371	0.0618
rs11674619	2	47555035	G	A	0.488293	0.120475	0.0153453	0.170337	0.152965	0.17564	0.1424
rs6752504	2	47555416	C	T	0.482005	0.124982	0.0194888	0.137261	0.134207	0.145204	0.1806
rs72812338	2	47555487	T	C	0.102105	0.0619871	0.00989783	0.0653213	0.0726256	0.102961	0.0586
rs11674800	2	47555617	C	A	0.198128	0.180885	0.139847	0.136155	0.0897134	0.0973044	0.1185
rs72812341	2	47555697	G	T	0.253521	0.171165	0.137324	0.136608	0.0901119	0.101316	0.0667
rs1882448	2	47558121	T	C	0.952315	0.849033	0.999681	0.818939	0.802609	0.954366	0.8215
rs56825645	2	47559940	C	G	0.255007	0.275125	0.166347	0.339354	0.287849	0.32157	0.2685
rs1425610	2	47560570	G	C	0.724869	0.607431	0.807816	0.705295	0.612859	0.75689	0.602
rs72872839	2	47565070	G	A	0.0710878	0.15776	0.10263	0.136119	0.105885	0.149269	0.1526
rs7594890	2	47569088	G	A	0.635002	0.620429	0.7287	0.461442	0.46678	0.597287	0.4774
rs7594899	2	47569110	G	C	0.308341	0.464899	0.437862	0.285604	0.288983	0.329365	0.3542
rs10178447	2	47574496	G	C	0.0962903	0.059824	0.165281	0.0289897	0.0483066	0.0670171	0.0551
rs60710864	2	47574776	T	C	0.116911	0.10509	0.267034	0.165501	0.171164	0.258287	0.1122
rs11683418	2	47576590	G	T	0.0777486	0.128226	0.26055	0.1212	0.141414	0.246063	0.1833
rs55833052	2	47577155	C	T	0.0613931	0.127656	0.258797	0.120928	0.141682	0.229756	0.1706
rs11682393	2	47577358	T	A	0.100988	0.131501	0.260591	0.119934	0.141807	0.240264	0.1228
rs114541469	2	47577655	G	C	0.0117353	0.0278552	0.000638978	0.0807839	0.0663774	0.0868421	0.0533
rs7609322	2	47578662	C	G	0.705206	0.503668	0.444302	0.490876	0.482888	0.590879	0.4892
rs4953504	2	47578901	T	C	0.0409017	0.189306	0.113274	0.259036	0.177445	0.144918	0.1541
rs28360910	2	47580584	A	G	0.215778	0.170187	0.132777	0.218184	0.259973	0.341561	0.281
rs6712433	2	47580607	C	G	0.104582	0.194816	0.143866	0.112835	0.139892	0.0832228	0.0815
rs6720323	2	47582164	G	T	0.376615	0.193407	0.15665	0.215287	0.231554	0.326073	0.1192
rs6748705	2	47582374	A	G	0.169502	0.0979359	0.000957854	0.0688302	0.0930946	0.105991	0.0769
rs112337450	2	47582821	G	A	0.0943448	0.0504369	0	0.0377231	0.068916	0.0389282	0.0645
rs11686238	2	47583845	G	T	0.461928	0.580775	0.577022	0.399923	0.472776	0.646904	0.1337
rs62140940	2	47583939	T	G	0.0370988	0.165372	0.148752	0.126077	0.169209	0.330257	0.0704
rs113070032	2	47584427	T	G	0.202585	0.32949	0.387997	0.173675	0.219086	0.219038	0.1078
rs4952891	2	47584699	C	T	0.827735	0.674739	0.582152	0.46691	0.601278	0.717449	0.383
rs4952892	2	47584758	C	T	0.991357	0.973086	1	0.98146	0.954222	0.983509	0.8846
rs2114023	2	47586996	T	G	0.224305	0.292712	0.452427	0.21256	0.221215	0.257746	0.1788
rs13032306	2	47587582	A	G	0.0894073	0.0615294	0.000319285	0.0385643	0.0985501	0.0309211	0.0659
rs59567488	2	47588274	G	A	0.0417619	0.233416	0.289827	0.120225	0.130454	0.158016	0.0736
rs11674351	2	47588405	A	G	0.316712	0.145495	0.126837	0.153145	0.151433	0.196252	0.0957
rs57725791	2	47588806	G	T	0.172786	0.251025	0.149808	0.164308	0.22532	0.366976	0.1515
rs62140945	2	47589532	A	C	0.0425943	0.173004	0.155492	0.129193	0.179725	0.333774	0.0996
rs11125145	2	47590322	C	A	0.734294	0.640235	0.574502	0.439657	0.556483	0.654888	0.3475
rs11677482	2	47590351	A	G	0.10247	0.111266	0.0166028	0.085515	0.092541	0.106299	0.0601
rs13416440	2	47590455	C	T	0.0971585	0.195199	0.143542	0.131067	0.209533	0.273479	0.0958
rs2348095	2	47591016	T	G	0.827731	0.646231	0.612212	0.437775	0.557414	0.659301	0.3271
rs201890107	2	47591323	C	T	0	0	0.00175439	0	0.000230026	0.000636132	0.0744
rs4953506	2	47591342	A	G	0.186086	0.235347	0.326017	0.121491	0.114839	0.265	0.0654
rs56112772	2	47591345	G	A	0.0827835	0.119779	0.00255428	0.0815207	0.115373	0.116325	0.0966
rs4953508	2	47591489	A	G	0.791526	0.644062	0.585147	0.437127	0.556267	0.653543	0.3602
rs7585355	2	47591616	G	T	0.264747	0.0839924	0.117572	0.110623	0.106853	0.214993	0.0556
rs13397771	2	47592200	A	C	0.101652	0.129616	0.12037	0.0640512	0.0939019	0.0662295	0.1026
rs4245815	2	47592833	G	A	0.68166	0.911842	0.94189	0.866463	0.903303	0.849869	0.9213
rs4953511	2	47594640	A	C	0.0698682	0.338835	0.636538	0.338071	0.268275	0.314717	0.264
rs3867336	2	47595057	C	T	0.943099	0.810054	0.97476	0.800115	0.760973	0.694481	0.6865
rs4521097	2	47595171	A	G	0.4708	0.396172	0.357052	0.426533	0.436235	0.365878	0.4437
rs6756180	2	47596900	C	T	0.443058	0.683617	0.801216	0.572514	0.636815	0.60646	0.6212
rs59793793	2	47596961	TGCTC	T	0.0646106	0.309499	0.627179	0.312921	0.245156	0.279354	0.2041
rs55936724	2	47596962	G	A	0.101733	0.260942	0.0170732	0.195066	0.250227	0.317216	0.1871
rs10166990	2	47597290	T	A	0.225947	0.471851	0.633312	0.422863	0.409746	0.476253	0.3614
rs7587517	2	47597388	C	A	0.598855	0.339645	0.333653	0.251342	0.332636	0.275	0.2566
rs6738542	2	47597727	C	T	0.543471	0.608967	0.636509	0.527285	0.553614	0.603699	0.5249
rs13422917	2	47597808	C	T	0.157921	0.434201	0.630838	0.417889	0.396326	0.423052	0.4022
rs4953513	2	47598120	G	A	0.146111	0.310282	0.612075	0.357225	0.310277	0.387097	0.3504
rs55957746	2	47598325	G	C	0.0281492	0.107692	0.00159642	0.0889441	0.122548	0.0990783	0.1217
rs56335957	2	47598998	A	T	0.0282511	0.107692	0.00159642	0.0893369	0.122471	0.0992768	0.1333
rs1425611	2	47599082	T	C	0.440376	0.439627	0.427518	0.364647	0.336676	0.375987	0.3204
rs62140953	2	47599257	A	G	0.276555	0.17553	0.00159949	0.13165	0.190769	0.133733	0.1699
rs11694783	2	47599542	G	A	0.440875	0.422716	0.414478	0.34831	0.334506	0.369551	0.305
rs6754404	2	47601253	G	C	0.41323	0.38171	0.39361	0.194758	0.262567	0.292571	0.2137
rs4953514	2	47602091	A	G	0.467576	0.515034	0.422855	0.548752	0.490943	0.518212	0.4573
rs4953515	2	47602339	G	A	0.827862	0.621677	0.417681	0.496431	0.558655	0.544371	0.2732
rs10198305	2	47603369	A	C	0.882551	0.723021	0.433696	0.664652	0.681924	0.644034	0.6647
rs12466921	2	47603552	G	A	0.0473173	0.144146	0.00159744	0.130987	0.175979	0.117996	0.1788
rs6705670	2	47603737	G	C	0.881287	0.720504	0.431818	0.667658	0.68096	0.64497	0.6404
rs62138601	2	47605671	C	A	0.0251463	0.111974	0.00159642	0.104896	0.126189	0.0978261	0.1061
rs13403625	2	47606090	C	G	0.590805	0.466432	0.419344	0.35268	0.385432	0.415559	0.3271
rs11676321	2	47606941	G	A	0.141456	0.156035	0.00159949	0.130096	0.180418	0.128638	0.1638
rs11681403	2	47610847	C	A	0.686972	0.431108	0.357189	0.152132	0.307695	0.336728	0.2434
rs11682666	2	47611016	G	C	0.383763	0.408611	0.568822	0.457694	0.43899	0.457209	0.4558
rs62138602	2	47611203	C	T	0.0624256	0.147955	0.00159541	0.145458	0.181911	0.129763	0.1495
rs6716657	2	47611583	G	A	0.584404	0.47559	0.427372	0.368988	0.382979	0.422587	0.2536
rs6716883	2	47611735	G	A	0.644745	0.475356	0.427653	0.328316	0.38171	0.421281	0.3039
rs6718826	2	47616971	G	C	0.273389	0.0717745	0.00127714	0.0430622	0.0952683	0.0636124	0.0694
rs6544997	2	47617366	A	G	0.736951	0.557038	0.371319	0.552662	0.50758	0.52431	0.5374
rs74727366	2	47617390	G	A	0.020466	0.0768216	0.00127632	0.185185	0.117814	0.101645	0.1495
rs6723621	2	47618706	G	T	0.558381	0.206861	0.00319081	0.135042	0.215421	0.160844	0.119
rs6727032	2	47619107	G	A	0.64891	0.247046	0.00351662	0.172594	0.270705	0.19358	0.2267
rs11125147	2	47619675	G	A	0.145845	0.346431	0.346006	0.28515	0.248876	0.280777	0.0833
rs10172010	2	47619930	A	G	0.149201	0.348996	0.355406	0.285097	0.253063	0.283498	0.2603
rs4953517	2	47620034	C	T	0.826555	0.613646	0.414907	0.449115	0.547474	0.49703	0.4958
rs7594642	2	47620042	T	C	0.678283	0.28163	0.0757673	0.21722	0.301253	0.214993	0.2642
rs13423403	2	47622352	C	T	0.038533	0.180904	0.236556	0.160622	0.176317	0.246042	0.1839
rs139771520	2	47622951	C	CT	0.561897	0.592925	0.64772	0.541489	0.527565	0.579017	0.2684
rs6714343	2	47623190	A	T	0.171152	0.137163	0.267561	0.0755492	0.105741	0.113845	0.1065
rs149493778	2	47623218	AC	A	0.0458504	0.0644689	0.0444089	0.0206304	0.0502354	0.0351974	0.0544
rs10206563	2	47623698	G	T	0.132906	0.1137	0.225271	0.0594874	0.103495	0.108882	0.0772
rs10206660	2	47623776	G	C	0.134856	0.125403	0.238935	0.0768052	0.104796	0.111513	0.1037
rs10171827	2	47623792	T	G	0.134552	0.125549	0.262012	0.0763796	0.105047	0.113666	0.1512
rs10209127	2	47623938	G	A	0.128611	0.101967	0.225703	0.0591398	0.0907682	0.0923127	0.1192
rs6705302	2	47624553	T	G	0.20052	0.201189	0.422065	0.287342	0.228347	0.256283	0.2319
rs6747656	2	47624767	C	T	0.369959	0.390325	0.518227	0.131301	0.229526	0.203099	0.2222
rs796077997	2	47624777	AT	A	0.653863	0.744789	0.914359	0.579505	0.641568	0.684263	0.457
rs10153534	2	47625149	G	C	0.344295	0.358645	0.469551	0.117619	0.229653	0.188492	0.2148
rs6722699	2	47625420	A	G	0.848493	0.783881	0.928799	0.605051	0.656242	0.700528	0.6389
rs10165802	2	47625504	G	A	0.129255	0.112584	0.238644	0.066348	0.0856231	0.0722733	0.1099
rs34777965	2	47625656	G	A	0.0922238	0.0674487	0.145006	0.173129	0.104836	0.138669	0.0752
rs142225123	2	47625733	AT	A	0.137009	0.11278	0.237988	0.0667112	0.0857475	0.0726496	0.0816
rs10166155	2	47625833	G	A	0.507092	0.459789	0.536812	0.361635	0.416186	0.468709	0.432
rs57177299	2	47626889	A	T	0.0959714	0.133081	0.257278	0.118477	0.126321	0.126653	0.0586
rs10153698	2	47626894	T	A	0.129372	0.183511	0.219653	0.0342714	0.0758632	0.0416391	0.0616
rs1317855	2	47627553	C	T	0.645479	0.671494	0.758189	0.633031	0.633446	0.641661	0.541
rs1317808	2	47627849	C	G	0.482771	0.548077	0.500963	0.37572	0.482173	0.384894	0.4764
rs77329142	2	47631636	G	A	0.187476	0.0897786	0.0263158	0.186787	0.144726	0.182993	0.1393
rs17036769	2	47633503	C	G	0.0639626	0.0745788	0.227302	0.0868733	0.123404	0.140924	0.0896
rs74706385	2	47635479	A	G	0.0146478	0.0708742	0.0584291	0.153126	0.0824867	0.173026	0.0816
rs4359707	2	47638128	C	G	0.25056	0.0965426	0.255442	0.0933793	0.135226	0.204142	0.115
rs72872891	2	47638144	C	G	0.25025	0.0961454	0.219489	0.0934687	0.135138	0.201316	0.1053
rs35454581	2	47638599	G	A	0.413396	0.119044	0.248243	0.101533	0.144242	0.225246	0.135
rs4266057	2	47639517	C	T	0.788199	0.521258	0.561859	0.444711	0.506697	0.510561	0.5231
rs398071287	2	47641116	A	AGGTGT	0.269597	0.39165	0.3357	0.471749	0.423521	0.405218	0.3872
rs6745013	2	47641840	A	C	0.925313	0.651013	0.644231	0.75557	0.660584	0.716082	0.6842
rs11385927	2	47642796	C	CG	0.843086	0.570926	0.597053	0.728207	0.629709	0.587558	0.637
rs60010947	2	47642851	C	T	0.064593	0.0471519	0.00127714	0.157124	0.0765347	0.0321945	0.1154
rs2881828	2	47643345	G	A	0.0653199	0.0455945	0.00127714	0.156083	0.0730271	0.0216535	0.065
rs72872897	2	47643625	A	G	0.0682143	0.0551239	0.0358285	0.176995	0.0799003	0.0338371	0.0982
rs72815875	2	47644828	T	C	0.272461	0.383267	0.397881	0.455626	0.414558	0.385046	0.5062
rs4953519	2	47644859	C	T	0.0271382	0.161952	0.197251	0.0964627	0.115927	0.0433355	0.0656
rs13391328	2	47645062	A	C	0.302896	0.381102	0.308381	0.450969	0.409932	0.378378	0.4351
rs6747575	2	47645648	T	C	0.954621	0.815593	0.90691	0.856556	0.779781	0.76761	0.7531
rs7596451	2	47645804	T	C	0.896345	0.647171	0.633717	0.757997	0.663868	0.720617	0.7115
rs11679268	2	47646031	A	T	0.595584	0.483577	0.339193	0.632031	0.503863	0.446082	0.16
rs60991393	2	47646473	G	A	0.0656304	0.0456875	0.00127959	0.15567	0.0727056	0.0203546	0.0769
rs1574378	2	47647213	T	A	0.882185	0.59408	0.595908	0.743396	0.65038	0.640039	0.6395
rs3863002	2	47647389	C	T	0.279396	0.116208	0.256074	0.104976	0.145221	0.209073	0.1398
rs1882450	2	47647464	G	C	0.914322	0.646761	0.62925	0.757512	0.658783	0.706636	0.7079
rs1574380	2	47647574	C	T	0.274881	0.383182	0.294798	0.450605	0.411022	0.373764	0.4304
rs2091750	2	47647822	T	G	0.914212	0.647408	0.628754	0.757321	0.659125	0.707181	0.6788
rs72875007	2	47647939	T	C	0.0754695	0.0550264	0.0358744	0.176922	0.0800762	0.0343008	0.124
rs13426166	2	47649515	T	A	0.241639	0.383663	0.289693	0.449617	0.411909	0.374422	0.3381
rs13413097	2	47649659	G	A	0.237112	0.37956	0.289187	0.449558	0.411483	0.376482	0.3988
rs1214778	2	47650768	C	T	0.279398	0.116211	0.253851	0.104424	0.144147	0.197281	0.1028
rs1214777	2	47650945	A	C	0.952378	0.813335	0.906969	0.85427	0.777201	0.76321	0.6429
rs11125149	2	47652063	C	T	0.41584	0.443362	0.335362	0.46981	0.419315	0.457622	0.4636
rs72875008	2	47652087	G	A	0.102621	0.0524388	0.0197957	0.15643	0.0772115	0.023622	0.1015
rs2677263	2	47654266	G	C	0.276051	0.134227	0.25128	0.120317	0.173411	0.209593	0.1344
rs2969777	2	47654411	G	A	0.951867	0.81393	0.900639	0.875239	0.774314	0.735197	0.7892
rs141410543	2	47654920	TC	T	0.57984	0.538487	0.557816	0.524188	0.571422	0.601521	0.3676
rs6747680	2	47654921	C	G	0.616658	0.548333	0.599769	0.597527	0.485775	0.399107	0.3456
rs113323112	2	47654929	G	C	0.013676	0.0410019	0.0124346	0.164581	0.0768858	0.00812458	0.3089
rs6722724	2	47658788	G	C	0.39618	0.41252	0.116667	0.562957	0.438574	0.463931	0.4679
rs58679426	2	47659552	T	C	0.0146864	0.0149485	0.00271003	0.116395	0.0246457	0.0153061	0.313
rs2677266	2	47660551	T	A	0.363836	0.140575	0.25016	0.109719	0.169084	0.203947	0.1445
rs2944779	2	47660641	A	G	0.251251	0.129651	0.250639	0.111675	0.169842	0.203546	0.1312
rs2944780	2	47660875	A	G	0.348358	0.138118	0.250321	0.112133	0.170716	0.204605	0.1343
rs10172072	2	47660901	A	C	0.094491	0.0769458	0.310411	0.080462	0.0344629	0.046707	0.053
rs2969774	2	47661684	T	C	0.888316	0.648235	0.636916	0.775361	0.671778	0.717822	0.6748
rs2952372	2	47661919	T	C	0.460089	0.213269	0.565064	0.18878	0.200149	0.246544	0.235
rs2969773	2	47662141	C	T	0.247822	0.126709	0.250801	0.111378	0.169262	0.199934	0.1116
rs2705765	2	47662389	A	C	0.956385	0.824956	0.853807	0.875024	0.799212	0.787178	0.7971
rs12328344	2	47662542	A	T	0.107191	0.0794639	0.31382	0.0929364	0.049162	0.04405	0.0625
rs4953521	2	47699998	A	G	0.0694577	0.118255	0.377799	0.0841773	0.0698071	0.202889	0.0772
rs67003367	2	47703561	G	C	0.334719	0.0816701	0.00191693	0.0260677	0.0561735	0.0607261	0.055
rs1378340026	2	47704294	C	CA	0.000625563	0.000857232	0.000656168	0.0024149	0.00040131	0.000700771	0.0506
rs1229575	2	47704313	G	T	0.986112	0.95823	0.74984	0.921315	0.945081	0.963134	0.9562
rs67765869	2	47704556	A	G	0.353376	0.0828814	0.00191816	0.025974	0.0568822	0.0604468	0.0588
rs58563662	2	47707210	T	C	0.298624	0.0809116	0.000959693	0.0266244	0.0607043	0.0478405	0.0704
rs10427209	2	47709297	C	T	0.311927	0.0817795	0.000958466	0.0267857	0.0602089	0.0483553	0.0753
rs10427344	2	47709476	A	C	0.311699	0.0815982	0.000957854	0.0268797	0.0606286	0.0489809	0.0681
rs1353173073	2	47709697	GA	G	0.00418399	0.00867549	0.00108303	0.0175414	0.0208341	0.0195853	0.0664
rs6719129	2	47712309	G	C	0.310198	0.0816011	0.000959693	0.0266846	0.0586077	0.0483444	0.0659
rs72875085	2	47712323	G	A	0.207159	0.0647619	0.000958466	0.0266131	0.0579169	0.0474621	0.0714
rs72875086	2	47712635	A	G	0.311365	0.0817702	0.000957854	0.026929	0.0601536	0.0485564	0.0568
rs67068403	2	47712911	C	T	0.2372	0.0673628	0.000958466	0.0269829	0.0579411	0.0477137	0.0639
rs2348237	2	47713801	G	A	0.414294	0.353904	0.357601	0.324808	0.386077	0.375	0.3033
rs2348238	2	47714165	G	A	0.183946	0.28715	0.355221	0.298825	0.328272	0.327303	0.3264
rs2348239	2	47714445	A	T	0.527193	0.371616	0.357969	0.325453	0.38748	0.380858	0.3699
rs2348240	2	47714654	G	T	0.52705	0.371186	0.358073	0.335235	0.388505	0.381195	0.4032
rs2348242	2	47714882	C	T	0.421368	0.354255	0.357511	0.325797	0.386327	0.383882	0.3319
rs7580511	2	47715005	C	G	0.42983	0.356912	0.359858	0.327699	0.386521	0.38955	0.3482
rs72817919	2	47715110	C	T	0.0295042	0.0958914	0.000638978	0.191886	0.153207	0.0262295	0.1484
rs4358172	2	47715415	G	A	0.423444	0.3562	0.359475	0.327417	0.388572	0.390276	0.4018
rs2881862	2	47715514	A	G	0.449673	0.385017	0.35806	0.439074	0.447145	0.404683	0.1111
rs4358173	2	47715565	C	T	0.423644	0.349559	0.358884	0.324545	0.385782	0.379801	0.3215
rs4325805	2	47715686	A	G	0.433824	0.382008	0.36891	0.440015	0.447368	0.403555	0.417
rs4588237	2	47715763	A	G	0.196842	0.315589	0.367072	0.413423	0.389722	0.35503	0.4149
rs66735853	2	47716195	G	A	0.426007	0.380718	0.368742	0.440492	0.447218	0.403428	0.4007
rs61637835	2	47716309	G	A	0.434311	0.384117	0.36594	0.442345	0.449379	0.405423	0.1808
rs4953523	2	47716488	C	T	0.424369	0.353071	0.365039	0.327159	0.387412	0.384894	0.1444
rs11892705	2	47717053	C	T	0.173866	0.123424	0.0124442	0.0494652	0.0626045	0.0933377	0.0556
rs17036906	2	47719967	C	T	0.0866495	0.0643172	0.000319693	0.118641	0.101299	0.0655036	0.0982
rs797703	2	47720652	C	T	0.253049	0.67326	0.53137	0.766966	0.698844	0.674556	0.6472
rs35207134	2	47720811	T	TAAAC	0.332152	0.729935	0.530078	0.79068	0.751213	0.722149	0.4644
rs797700	2	47720962	C	T	0.333694	0.73047	0.533953	0.795278	0.752294	0.721927	0.761
rs544842291	2	47721061	G	C	0.00135272	0.00288632	0.000321337	0.00560142	0.0117536	0.00134048	0.0503
rs797699	2	47721137	G	A	0.253182	0.67331	0.531351	0.767899	0.701991	0.670326	0.4803
rs797698	2	47721143	T	C	0.349558	0.737502	0.532665	0.792788	0.753801	0.714997	0.5726
rs560333861	2	47721169	A	AT	0.254575	0.67671	0.533635	0.768444	0.702511	0.669679	0.5481
rs797697	2	47721197	G	A	0.331502	0.730044	0.535645	0.793855	0.75188	0.714143	0.6735
rs797696	2	47721250	A	G	0.333781	0.730764	0.534704	0.794458	0.752156	0.715894	0.6682
rs797695	2	47721559	A	G	0.335182	0.730617	0.533654	0.793209	0.752286	0.719142	0.7463
rs797693	2	47721751	T	C	0.326792	0.727028	0.527922	0.782544	0.750694	0.714524	0.5824
rs13008932	2	47721757	C	T	0.00171498	0.0120069	0.0147493	0.0772472	0.0238363	0.0148148	0.4115
rs536261356	2	47721897	C	CG	0.330124	0.729246	0.533589	0.788678	0.749377	0.716029	0.6032
rs797692	2	47723834	C	T	0.257321	0.651839	0.501603	0.725278	0.701528	0.6729	0.6791
rs7594412	2	47724054	C	T	0.611511	0.294122	0.497444	0.251777	0.24931	0.284211	0.25
rs78172075	2	47724512	T	C	0.0178342	0.0532492	0.000319489	0.15943	0.0974627	0.0137795	0.1237
rs797691	2	47724686	T	A	0.380734	0.729629	0.531812	0.792737	0.751629	0.716074	0.7434
rs797690	2	47724754	T	A	0.381974	0.73104	0.530186	0.792552	0.751658	0.719304	0.7093
rs797688	2	47725259	C	A	0.370266	0.72862	0.533333	0.792456	0.751961	0.715461	0.7507
rs797686	2	47725521	C	T	0.381036	0.729994	0.53123	0.789738	0.749814	0.715887	0.7266
rs797684	2	47725735	A	G	0.380155	0.730278	0.533697	0.792498	0.751807	0.716261	0.7206
rs34001741	2	47725837	AT	A	0.33459	0.725601	0.528562	0.765684	0.747517	0.717222	0.4199
rs797683	2	47725993	A	C	0.312974	0.723113	0.534427	0.79372	0.752095	0.719722	0.7089
rs34688839	2	47726003	TA	T	0.315222	0.722628	0.536316	0.792771	0.750725	0.716554	0.5825
rs810016	2	47726049	A	C	0.311594	0.722558	0.534194	0.793067	0.75145	0.719391	0.7713
rs330796	2	47726311	A	T	0.311782	0.721969	0.53263	0.792603	0.75148	0.716733	0.2917
rs72817929	2	47728274	G	C	0.0105416	0.0408791	0.000957854	0.0259889	0.0520072	0.0436638	0.0698
rs111920826	2	47728780	A	C	0.130676	0.0558252	0.000957854	0.0231109	0.0491956	0.0426305	0.0521
rs575795031	2	47728824	A	AT	0.12013	0.0535662	0.000959693	0.0231845	0.0490807	0.0430921	0.0582
rs75828692	2	47728847	G	A	0.0529667	0.0458817	0.000959079	0.0232892	0.0487215	0.0433925	0.0625
rs59646997	2	47728920	T	C	0.131185	0.055963	0.000959079	0.0231668	0.0511744	0.0434496	0.0534
rs6744947	2	47729542	C	T	0.130455	0.0559138	0.000958466	0.0230755	0.0498575	0.0433355	0.0552
rs2098241	2	47729705	A	G	0.130874	0.0559466	0.000957854	0.0232869	0.049258	0.0434496	0.0516
rs808846	2	47730934	G	A	0.0891734	0.318995	0.106615	0.329837	0.269452	0.219463	0.2328
rs72809566	2	47731306	A	G	0.0790315	0.0501908	0.000958466	0.0229719	0.0491938	0.0430355	0.0547
rs229968	2	47733092	G	A	0.238847	0.651153	0.528939	0.662505	0.645539	0.656682	0.57
rs72809568	2	47733401	A	T	0.00946771	0.0362956	0.00319693	0.0233225	0.048652	0.0387674	0.0561
rs77491430	2	47734573	C	A	0.0636956	0.0473399	0.00319081	0.0233002	0.0480882	0.0436638	0.0531
rs72809574	2	47734673	G	T	0.0528933	0.0455811	0.00319285	0.0232225	0.0486819	0.0430355	0.051
rs7562842	2	47735114	C	T	0.134633	0.0558815	0.00319898	0.0233359	0.0491417	0.0430921	0.0801
rs112190080	2	47736113	T	C	0.0831628	0.0510772	0.00319489	0.0231181	0.0493248	0.0438076	0.075
rs72809580	2	47737309	G	T	0.0645511	0.0494514	0.00321337	0.0236243	0.0486475	0.0440188	0.0606
rs75342628	2	47739538	A	C	0.0212346	0.0387716	0.22922	0.078334	0.0757947	0.100197	0.0694
rs77519895	2	47740092	G	C	0.0190302	0.0339257	0.230449	0.0671842	0.0619769	0.0956464	0.0705
rs72809581	2	47740545	T	G	0.0414645	0.0312042	0.217029	0.0669728	0.0665892	0.0391705	0.0621
rs330789	2	47740938	G	A	0.460092	0.767019	0.758986	0.86069	0.816	0.816832	0.7488
rs72809582	2	47741536	T	C	0.0100794	0.0393851	0.00319489	0.0235732	0.0516739	0.039042	0.0526
rs28876209	2	47744591	T	A	0.43869	0.402174	0.484848	0.366667	0.360617	0.5	0.6277
rs868498581	2	47744593	T	A	0.356552	0.32069	0.490385	0.0961538	0.274887	0.483871	0.2479
rs113602574	2	47747399	T	C	0.10628	0.182066	0.0047954	0.253317	0.271707	0.090969	0.318
rs72809584	2	47749774	A	G	0.00987249	0.0382357	0.00255265	0.0235957	0.0505715	0.0394477	0.0605
rs2969769	2	47750880	C	T	0.534893	0.762506	0.728819	0.756565	0.773037	0.81896	0.7143
rs713089	2	47751568	T	C	0.184326	0.227433	0.00734824	0.270877	0.321972	0.135286	0.2251
rs78033325	2	47752203	A	G	0.0122799	0.0409704	0.000319285	0.036261	0.0549738	0.00825083	0.0502
rs57827032	2	47752498	C	T	0.101924	0.174794	0.00478622	0.217671	0.263348	0.0898026	0.2188
rs406334	2	47752548	A	G	0.596254	0.778161	0.741003	0.776743	0.78945	0.824868	0.7963
rs111230286	2	47753033	A	C	0.0995851	0.164259	0.00449006	0.182605	0.254089	0.0850777	0.256
rs562410128	2	47753698	T	A	0.0103064	0.0419755	0.00290135	0.0251758	0.0547743	0.041115	0.0625
rs7575752	2	47756440	A	T	0.365765	0.276479	0.296311	0.188502	0.251203	0.23049	0.1838
rs144179734	2	47756844	C	T	0.112079	0.180705	0.00424282	0.238756	0.296392	0.0984061	0.1732
rs77412174	2	47758728	A	T	0.15216	0.200408	0.0058102	0.253455	0.29333	0.101108	0.2551
rs575729674	2	47758863	G	GA	0.118111	0.197019	0.00610932	0.269314	0.297231	0.104208	0.1938
rs146245225	2	47759841	A	C	0.213995	0.201692	0.00320924	0.248797	0.294377	0.103691	0.2672
rs7578655	2	47760185	C	A	0.201424	0.201102	0.00415601	0.267339	0.288786	0.10611	0.2778
rs111748530	2	47760875	G	A	0.137928	0.181053	0.00387847	0.290399	0.293058	0.0815436	0.2298
rs142538877	2	47761166	C	CT	0.181966	0.197627	0.00390371	0.284821	0.296114	0.0910326	0.2432
rs6733146	2	47761412	G	A	0.17487	0.121466	0.0625401	0.109219	0.164272	0.183984	0.2199
rs2348243	2	47762009	C	G	0.124357	0.181772	0.00351438	0.273545	0.291009	0.0794485	0.2691
rs113192699	2	47764053	A	G	0.184684	0.211275	0.00545922	0.302218	0.313606	0.110033	0.2822
rs76658602	2	47765810	T	C	0.139196	0.188257	0.0035279	0.284291	0.296619	0.081171	0.2915
rs113903871	2	47766761	C	G	0.14166	0.186647	0.00383142	0.28179	0.291376	0.0863427	0.2367
rs74330892	2	47767698	A	G	0.049495	0.0454145	0.000319898	0.0510439	0.0743765	0.0652174	0.0701
rs61030588	2	47768715	A	G	0.19335	0.195398	0.00388853	0.28334	0.293997	0.0816882	0.3216
rs72876814	2	47769531	G	A	0.101927	0.0442322	0.000319898	0.0436865	0.0686107	0.0441953	0.0616
rs140215365	2	47770893	G	A	0.180241	0.196379	0.00385356	0.282004	0.290889	0.0856574	0.2227
rs114702751	2	47771200	C	A	0.0477969	0.0388954	0.000319081	0.0437691	0.0735372	0.0606955	0.0802
rs75508678	2	47771280	T	C	0.128263	0.185912	0.00127959	0.280058	0.290849	0.0746711	0.2974
rs75406041	2	47771417	T	G	0.180258	0.196114	0.00383142	0.280525	0.291206	0.0844284	0.2958
rs113816852	2	47771447	C	G	0.128622	0.184875	0.00127632	0.281478	0.290901	0.0716634	0.2832
rs17036952	2	47772341	C	T	0.0457882	0.0387722	0.000319489	0.0436447	0.0737372	0.0634868	0.0531
rs112283829	2	47773514	C	G	0.129844	0.189094	0.00128783	0.284107	0.29293	0.0717623	0.2747
rs72809587	2	47773792	G	C	0.0748329	0.11773	0.0508312	0.108914	0.168114	0.161056	0.191
rs60444285	2	47773877	A	T	0.12907	0.186072	0.00127796	0.281044	0.292309	0.0710526	0.2971
rs58419715	2	47775225	T	C	0.130129	0.187482	0.0012837	0.281472	0.29227	0.0744401	0.2804
rs79130579	2	47777112	T	A	0.0387543	0.0484391	0.000319285	0.157422	0.107306	0.0167763	0.1333
rs751729411	2	47777218	GT	G	0.0212729	0.0487805	0.00167224	0.167234	0.109194	0.0174216	0.1333
rs78980632	2	47778090	G	A	0.0204613	0.0465665	0.000319898	0.157885	0.107185	0.0168095	0.1418
rs76928871	2	47778682	A	G	0.0950806	0.137236	0.000957854	0.123351	0.185631	0.0577807	0.1713
rs111462799	2	47779796	C	G	0.0216593	0.05074	0.000327654	0.16266	0.112159	0.0175137	0.1317
rs111490869	2	47780197	G	A	0.0207806	0.0470935	0.000640205	0.157464	0.10752	0.0165673	0.1056
rs398080228	2	47780697	TA	T	0.931598	0.67696	0.876383	0.647059	0.729049	0.763821	0.4795
rs111896897	2	47780732	G	A	0.0207657	0.0495588	0.000320307	0.156359	0.109136	0.0168428	0.1034
rs330792	2	47781435	A	C	0.023026	0.0943507	0.0481812	0.144848	0.117742	0.11392	0.1053
rs796992565	2	47781742	GC	G	0.743835	0.534037	0.874837	0.557882	0.549012	0.701778	0.4686
rs3136240	2	47784947	C	T	0.0545107	0.124871	0.000957243	0.121061	0.183023	0.056213	0.1283
rs3136241	2	47785236	G	C	0.110745	0.1335	0.000962155	0.1219	0.184816	0.0579087	0.1421
rs113492636	2	47785267	G	T	0.0206181	0.0470355	0.000319693	0.157637	0.108209	0.0161078	0.0722
rs3136242	2	47785381	C	A	0.0456455	0.0355503	0.000319489	0.0435453	0.0683033	0.0383598	0.066
rs3136250	2	47786509	G	A	0.370824	0.400244	0.00502008	0.472787	0.438443	0.324798	0.1966
rs3136254	2	47787282	CCT	C	0.0206883	0.0498014	0.000320102	0.157206	0.109837	0.0168762	0.1681
rs3136265	2	47789018	C	G	0.397422	0.178844	0.252813	0.12836	0.184847	0.213292	0.0724
rs3136267	2	47789175	T	C	0.248014	0.225589	0.00224936	0.323024	0.363112	0.124083	0.2845
rs3136269	2	47789214	G	A	0.109193	0.128899	0.000959693	0.120653	0.182951	0.0566162	0.1229
rs3136272	2	47789757	G	T	0.242996	0.226404	0.00223642	0.32273	0.361771	0.123188	0.375
rs59819548	2	47789831	C	CT	0.0969082	0.127499	0.00291074	0.118659	0.184118	0.057047	0.0801
rs3136274	2	47789913	C	T	0.048281	0.0350169	0.000319489	0.0434741	0.0680543	0.0379288	0.0697
rs3136282	2	47791175	T	A	0.239942	0.224148	0.00319693	0.318226	0.359868	0.123514	0.3053
rs3136284	2	47791517	T	C	0.0548353	0.122023	0.000959079	0.121546	0.183768	0.0555191	0.216
rs10210340	2	47791855	T	A	0.249577	0.155539	0.054768	0.106459	0.17865	0.226238	0.2
rs3136286	2	47791908	G	A	0.0481266	0.0354255	0.000320307	0.0434699	0.0683608	0.0378041	0.0591
rs3136288	2	47792275	G	A	0.109394	0.129184	0.000959693	0.121131	0.183467	0.05625	0.1528
rs3136290	2	47792584	G	C	0.0207242	0.0495231	0.000319081	0.158359	0.109823	0.0170716	0.1321
rs1321229070	2	47793737	C	CT	0.00159103	7.66636e-05	0.00065445	0.00432948	0.000286907	0.00136986	0.0547
rs137989074	2	47793753	C	T	0.0114145	0.0389168	0.000320513	0.0381002	0.0540313	0.00827815	0.0526
rs70943323	2	47794065	CA	C	0.999976	1	0.99968	0.999903	0.999953	0.99967	0.9753
rs2908440	2	47794107	A	G	1	1	1	1	0.999969	1	1
rs2908439	2	47794115	T	C	0.999976	0.999853	0.999039	1	0.999953	0.99967	1
rs2908438	2	47794139	C	G	0.999976	1	0.99968	1	0.999953	1	1
rs3136302	2	47794240	G	C	0.816566	0.421726	0.249037	0.449131	0.547778	0.346939	0.5357
rs3136303	2	47794328	A	G	0.0211405	0.0510654	0.000641026	0.159474	0.112365	0.0175846	0.1337
rs111861797	2	47795549	T	C	0.110464	0.127823	0.00096401	0.116077	0.183921	0.0557769	0.2137
rs3136315	2	47795621	A	G	0.112222	0.129853	0.000968992	0.128329	0.185359	0.0571142	0.1615
rs3136316	2	47795761	A	G	0.927531	0.741285	0.893822	0.677111	0.745599	0.804693	0.7213
rs1800934	2	47795842	G	T	0.293732	0.157388	0.245996	0.119705	0.173085	0.206908	0.176
rs2159886	2	47796734	T	G	0.181224	0.188463	0.00160359	0.282167	0.29762	0.08	0.2824
rs3136348	2	47803038	C	T	0.0789361	0.0892412	0.00127796	0.0894465	0.129055	0.0352902	0.0995
rs3136354	2	47804233	C	T	0.701031	0.596196	0.881824	0.421372	0.488062	0.670611	0.47
rs138593458	2	47804549	AAG	A	0.746827	0.563841	0.835594	0.44161	0.548328	0.678355	0.426
rs74533980	2	47804556	A	G	0.0153522	0.0380475	0.000319693	0.146324	0.0866269	0.0134957	0.1176
rs3136357	2	47805433	C	T	0.0206043	0.0492752	0.000319489	0.157718	0.109922	0.0167543	0.0686
rs7562367	2	47805474	G	A	0.837237	0.624266	0.869413	0.624185	0.662131	0.730289	0.5849
rs185882198	3	30607801	T	A	0.0489474	0.205262	0.115	0.133543	0.0920286	0.180889	0.0924
rs6791557	3	30614676	G	A	0.399212	0.386287	0.768074	0.527586	0.433593	0.507931	0.5504
rs12631851	3	30615305	G	C	0.214879	0.379219	0.753841	0.542371	0.442722	0.469059	0.4809
rs6767523	3	30615424	A	G	0.727633	0.434795	0.7678	0.554892	0.456273	0.512147	0.5169
rs397748640	3	30615746	A	AT	0.723073	0.4335	0.768394	0.557016	0.456097	0.513917	0.3945
rs6770400	3	30615883	A	T	0.728084	0.435843	0.767903	0.55722	0.456396	0.512658	0.573
rs1991657	3	30616539	C	T	0.725819	0.434977	0.767583	0.557061	0.455782	0.510177	0.5587
rs17025738	3	30619961	GC	G	0.256953	0.381235	0.409704	0.516439	0.453243	0.436142	0.4961
rs7644802	3	30622829	G	A	0.463168	0.54027	0.286189	0.52281	0.464951	0.407941	0.3153
rs6804281	3	30624048	C	A	0.456899	0.498751	0.285256	0.445727	0.465077	0.431908	0.3082
rs1835539	3	30624610	G	A	0.0467566	0.286135	0.0954223	0.219867	0.222336	0.0680224	0.173
rs4955212	3	30627866	G	A	0.247742	0.320857	0.182778	0.261104	0.238895	0.176159	0.2021
rs76089205	3	30630836	A	G	0.0447942	0.0452612	0.254808	0.0512624	0.0310505	0.0960526	0.0558
rs6809777	3	30630870	C	T	0.251231	0.257542	0.165705	0.241758	0.278707	0.28496	0.3209
rs1817338	3	30631239	G	A	0.816311	0.587902	0.705845	0.594809	0.577126	0.57893	0.5287
rs17025824	3	30633179	A	G	0.0417004	0.0487841	0.261859	0.076798	0.0433988	0.145669	0.0505
rs12491780	3	30633562	C	T	0.0863359	0.244937	0.294118	0.287928	0.270915	0.204531	0.2872
rs11466491	3	30633659	C	T	0.204053	0.222116	0.0361716	0.204197	0.235424	0.195466	0.2273
rs13083813	3	30638066	A	T	0.844244	0.615379	0.723895	0.648659	0.637609	0.659895	0.6697
rs11367094	3	30640658	TA	T	0.132351	0.285379	0.684531	0.381662	0.339199	0.376726	0.3182
rs73823653	3	30643946	G	A	0.0313303	0.0391094	0.00255428	0.0349437	0.045708	0.0111475	0.0584
rs59190769	3	30645491	C	T	8.06105e-05	8.23316e-05	0	0	8.24457e-05	0	0.0705
rs13095432	3	30645531	G	C	0.291368	0.252767	0.67792	0.308317	0.286225	0.33698	0.3
rs11917266	3	30645538	T	C	0.322595	0.291996	0.682976	0.345264	0.332376	0.350731	0.3174
rs13079374	3	30645590	T	A	0.333568	0.301912	0.688599	0.375373	0.337137	0.36452	0.1268
rs4586858	3	30645781	C	T	0.335705	0.302177	0.689467	0.380911	0.337551	0.367462	0.295
rs13081020	3	30646477	T	C	0.336983	0.302157	0.690537	0.381998	0.337726	0.366054	0.3796
rs58965035	3	30647148	C	T	0.304825	0.264473	0.68734	0.347985	0.295071	0.356814	0.4147
rs58031875	3	30647241	C	T	0.0934806	0.225634	0.440895	0.276298	0.263034	0.201645	0.293
rs13086588	3	30647265	T	G	0.313712	0.288121	0.442985	0.32627	0.336102	0.213439	0.4235
rs57328659	3	30647668	A	AATT	0.180265	0.230923	0.432476	0.270687	0.262039	0.197527	0.1064
rs61132534	3	30647702	A	C	0.181422	0.23219	0.430323	0.273676	0.262169	0.200333	0.3226
rs56303666	3	30647710	A	G	0.181623	0.232401	0.430278	0.274247	0.262209	0.204116	0.2754
rs114898422	3	30647718	C	G	0.128195	0.0534901	0.00255591	0.049923	0.0735737	0.0119617	0.0635
rs7613040	3	30647811	T	G	0.799207	0.605766	0.725962	0.637206	0.634216	0.636003	0.437
rs35600848	3	30647929	G	A	0.0886874	0.220968	0.412236	0.274442	0.254746	0.194079	0.2345
rs2029314	3	30650727	T	C	0.957061	0.914175	0.997766	0.886498	0.862918	0.908613	0.8694
rs3773626	3	30652872	A	T	0.165182	0.202667	0.370524	0.11229	0.124446	0.190492	0.1213
rs13068562	3	30653316	G	A	0.176219	0.23447	0.372229	0.146824	0.127248	0.192308	0.0629
rs7428831	3	30653424	A	G	0.189214	0.204231	0.369551	0.112558	0.124887	0.191108	0.0571
rs1872979	3	30655071	T	C	0.764661	0.708871	0.622045	0.778235	0.739211	0.715273	0.7295
rs3773629	3	30655152	G	A	0.204059	0.204935	0.370513	0.112005	0.124593	0.190492	0.1057
rs12490466	3	30657485	G	A	0.164403	0.203679	0.370038	0.111782	0.124438	0.189269	0.1206
rs1864615	3	30658290	T	C	0.53766	0.682318	0.621725	0.779116	0.738433	0.713863	0.7945
rs6550007	3	30660309	T	C	0.922736	0.906827	0.992342	0.890302	0.864012	0.913816	0.8879
rs3830320	3	30661293	ACT	A	0.155359	0.232214	0.165176	0.157532	0.201535	0.220579	0.2185
rs2372093	3	30662306	A	T	0.180263	0.237166	0.355954	0.171201	0.184717	0.200329	0.1753
rs1350782	3	30662955	A	G	0.392814	0.452703	0.129404	0.510538	0.523065	0.360304	0.0522
rs11359371	3	30663287	TA	T	0.710815	0.700338	0.300192	0.668463	0.719888	0.568376	0.7594
rs67573460	3	30663363	G	A	0.0418056	0.205265	0.000959693	0.13486	0.140753	0.0424901	0.1191
rs116720232	3	30665362	A	G	0.00584907	0.0106134	0	0.067271	0.0347022	0.00393701	0.0549
rs891591	3	30666765	G	C	0.57376	0.675634	0.303147	0.649843	0.70228	0.56484	0.7035
rs5847639	3	30666806	AT	A	0.574537	0.675759	0.307743	0.636325	0.700587	0.565862	0.3831
rs3773640	3	30668019	A	T	0.246434	0.273101	0.697563	0.252016	0.228875	0.350658	0.2521
rs6789143	3	30669007	G	C	0.35571	0.668086	0.425546	0.658867	0.699904	0.544224	0.6865
rs12498079	3	30669273	A	T	0.105567	0.192782	0.271447	0.162507	0.125926	0.199278	0.1321
rs17026123	3	30669764	A	G	0.156043	0.23557	0.149712	0.209906	0.221795	0.206114	0.1848
rs9850982	3	30669801	G	T	0.2946	0.338018	0.123077	0.406268	0.412492	0.34443	0.5132
rs397844066	3	30669801	GA	G	0.15555	0.235617	0.148267	0.210138	0.221594	0.214474	0.0918
rs11466511	3	30671335	A	C	0.156014	0.237282	0.150128	0.209421	0.222987	0.217434	0.2331
rs2116142	3	30676169	A	G	0.237297	0.348651	0.317455	0.255899	0.290427	0.213911	0.2545
rs1841529	3	30678280	G	A	0.36144	0.66674	0.560616	0.536884	0.564712	0.435484	0.4529
rs7626088	3	30678547	A	C	0.542299	0.368696	0.307229	0.24015	0.3497	0.259887	0.3679
rs2372212	3	30679709	A	G	0.846425	0.844436	0.658552	0.74665	0.800963	0.644875	0.7439
rs6790555	3	30680097	C	T	0.497318	0.754386	0.643086	0.757524	0.731977	0.533686	0.4823
rs4955189	3	30680447	C	T	0.285598	0.435869	0.227856	0.445654	0.371678	0.202365	0.3642
rs3773654	3	30680920	T	G	0.848583	0.826297	0.664533	0.742786	0.777488	0.627632	0.7089
rs1346907	3	30681978	A	G	0.745927	0.596371	0.672756	0.62452	0.536126	0.547995	0.5429
rs73054847	3	30685592	G	A	0.114072	0.0978181	0.316059	0.114907	0.11083	0.254432	0.1107
rs3773660	3	30686284	G	A	0.0963692	0.0957478	0.316816	0.115104	0.110862	0.253456	0.1
rs73054849	3	30687098	C	A	0.114029	0.0974787	0.316784	0.115082	0.110789	0.253947	0.1136
rs9838539	3	30687433	C	T	0.308045	0.104197	0.081202	0.13028	0.147759	0.196252	0.1506
rs9843143	3	30687737	G	C	0.847247	0.583517	0.572575	0.557777	0.469329	0.472387	0.417
rs11466522	3	30687754	G	A	0.112775	0.0947631	0.319231	0.120554	0.110526	0.249011	0.1022
rs9843942	3	30688144	G	A	0.548147	0.486956	0.366837	0.311252	0.365024	0.48456	0.3472
rs9831372	3	30691038	G	A	0.33409	0.112667	0.38806	0.124234	0.103199	0.27712	0.1306
rs7630948	3	30691042	A	C	0.0948559	0.0920358	0.357884	0.124569	0.101162	0.242594	0.1278
rs13096329	3	36995193	G	A	0.00843569	0.049243	0.227418	0.0862301	0.0388947	0.0601454	0.0502
rs576719628	3	36995375	C	CT	0.00438127	0.0201231	0	0.00615006	0.0231668	0.0078125	0.0594
rs9852378	3	36997280	C	T	0.386395	0.416116	0.0643406	0.367919	0.458199	0.238158	0.48
rs4647215	3	36999829	C	A	0.209945	0.392988	0.0641026	0.365675	0.452735	0.22332	0.4297
rs4647218	3	37000591	A	G	0.386627	0.416422	0.0642173	0.367502	0.458464	0.239302	0.4917
rs4647222	3	37001469	A	C	0.20982	0.392286	0.0638162	0.36368	0.452504	0.221748	0.4128
rs149960103	3	37001672	G	GT	0.066698	0.1608	0.044977	0.0842934	0.132195	0.104659	0.1313
rs4647224	3	37001739	G	A	0.386758	0.416482	0.0642261	0.365313	0.458544	0.253785	0.3923
rs59335282	3	37001952	GT	G	0.31856	0.443008	0.0818859	0.430501	0.493929	0.252644	0.244
rs28393182	3	37001968	T	G	0.205544	0.385379	0.0632627	0.33387	0.446858	0.22185	0.4199
rs1540354	3	37002998	A	T	0.0362533	0.159068	0.321497	0.265005	0.183356	0.310026	0.1864
rs12171282	3	37006092	A	G	0.390591	0.421418	0.0633484	0.379908	0.458492	0.236177	0.352
rs113479434	3	37006286	G	A	0.21054	0.393257	0.0647021	0.366836	0.452699	0.221485	0.3733
rs113956733	3	37010579	T	C	0.383596	0.414479	0.0640615	0.356929	0.457214	0.236527	0.3191
rs4647260	3	37013110	T	C	0.466187	0.446668	0.0644231	0.403182	0.486956	0.246544	0.3038
rs11710807	3	37018830	C	T	0.210671	0.392469	0.0636596	0.364473	0.45275	0.222076	0.3457
rs544995368	3	37019732	A	AT	0.0280595	0.00726592	0.000647249	0.00245198	0.00536518	0.0159214	0.0524
rs28754348	3	37022237	G	A	0.20998	0.39186	0.0639386	0.3648	0.452582	0.221565	0.4803
rs6550445	3	37024878	T	C	0.371479	0.412625	0.0636596	0.363015	0.456917	0.236358	0.4164
rs6550446	3	37024882	T	A	0.46462	0.445497	0.0636596	0.399538	0.485747	0.244087	0.4259
rs144287831	3	37026588	T	C	0.0818355	0.227859	0.0223499	0.289661	0.324419	0.122039	0.2967
rs6781146	3	37026766	C	T	0.229667	0.395462	0.0641026	0.367535	0.453054	0.222296	0.4603
rs9852810	3	37027478	G	A	0.210673	0.392831	0.0637004	0.366313	0.452567	0.220395	0.438
rs11719992	3	37028381	T	G	0.229232	0.394789	0.0651178	0.365716	0.453688	0.222851	0.3133
rs3774334	3	37031214	G	A	0.228808	0.39432	0.0638978	0.364948	0.452551	0.221274	0.4259
rs997588	3	37033651	G	A	0.462023	0.437079	0.0642583	0.39302	0.46273	0.235493	0.4155
rs6772548	3	37034443	T	C	0.467754	0.447013	0.0642173	0.401057	0.486779	0.245066	0.4429
rs6784088	3	37034493	A	G	0.59758	0.48518	0.0820562	0.440288	0.525957	0.261685	0.3939
rs141716664	3	37036708	G	GT	0.0819403	0.2281	0.0220729	0.288643	0.324237	0.12212	0.1829
rs6550447	3	37036789	G	C	0.375566	0.414552	0.0642994	0.366475	0.458159	0.237171	0.4242
rs4678925	3	37037015	A	G	0.210593	0.392847	0.0639386	0.364194	0.45269	0.221274	0.3388
rs67401825	3	37044479	T	C	0.210495	0.392479	0.063857	0.36347	0.452725	0.219987	0.4272
rs9822082	3	37044713	G	A	0.37552	0.41157	0.0643406	0.358627	0.450337	0.234808	0.4139
rs9831178	3	37045926	C	T	0.210866	0.392227	0.0639386	0.363197	0.452119	0.221414	0.3433
rs74837207	3	37050203	A	G	0.0153627	0.0566134	0.0271565	0.04811	0.0732875	0.0412844	0.0651
rs865824853	7	5983653	T	C	0	0.000149656	0	0	0	0	0.0661
rs142505865	7	5986591	C	CTGA	0.199847	0.107243	0.0614597	0.174035	0.139668	0.214854	0.1036
rs12531179	7	5989056	C	T	0.0419366	0.194498	0.313543	0.10284	0.14816	0.173913	0.1327
rs112867177	7	5989065	T	C	0.0892168	0.0593034	0.098975	0.10264	0.0807896	0.0886991	0.0673
rs12536167	7	5989137	G	A	0.658072	0.662236	0.824808	0.697333	0.728839	0.78956	0.6929
rs12702459	7	5989381	T	C	0.627757	0.677989	0.820628	0.701	0.737759	0.804491	0.6927
rs149249785	7	5990059	G	GT	0.041994	0.15362	0.000638162	0.214107	0.238899	0.111551	0.2
rs28699470	7	5990117	C	T	0.208506	0.390742	0.380051	0.351007	0.416297	0.357237	0.351
rs62456178	7	5990656	G	A	0.208188	0.390533	0.379089	0.351135	0.416153	0.355263	0.4649
rs77283699	7	5990806	G	C	0.0173472	0.0321161	0.344231	0.0871103	0.0418654	0.169619	0.0509
rs55842018	7	5991091	A	G	0.117115	0.141336	0.0338875	0.0872226	0.144981	0.0596721	0.1385
rs7776504	7	5992326	C	T	0.208779	0.387316	0.380968	0.348884	0.418948	0.364489	0.25
rs12702460	7	5993117	T	A	0.203902	0.104271	0.0619808	0.175691	0.139116	0.213675	0.1128
rs10686447	7	5993429	A	ATGT	0.991901	0.972473	0.985484	0.981415	0.95229	0.958528	0.785
rs12702461	7	5993838	G	A	0.0637622	0.0956337	0.0635622	0.188924	0.140978	0.209337	0.1075
rs111515162	7	5994572	A	G	0.0734206	0.047517	0.107005	0.0974813	0.0727718	0.0880026	0.0682
rs7788441	7	5996313	A	G	0.547025	0.669148	0.820348	0.70133	0.740621	0.725658	0.7632
rs138928387	7	5996317	GC	G	0.0201515	0.0623161	0.35116	0.0933244	0.0419715	0.169519	0.0574
rs71524066	7	5996575	G	A	0.429449	0.25183	0.240209	0.382192	0.315031	0.345872	0.0874
rs10235277	7	5996614	C	T	0.366618	0.418347	0.384457	0.309833	0.519145	0.399261	0.6565
rs59790240	7	5997601	A	G	0.095061	0.108056	0.0329495	0.0738082	0.104165	0.0348684	0.0682
rs75745061	7	5998084	T	G	0.208656	0.360813	0.364468	0.348321	0.418262	0.363484	0.5354
rs74189692	7	5998092	T	G	0.202612	0.359794	0.364286	0.348549	0.418277	0.362626	0.5308
rs190224996	7	5998331	C	T	0.0190794	0.0698208	0.000321543	0.0261545	0.100237	0.0643663	0.0733
rs76993112	7	5998360	G	A	0.0200096	0.0622212	0.353532	0.0892857	0.0417018	0.169215	0.0719
rs73331331	7	5998414	T	C	0.203919	0.352246	0.374672	0.350963	0.41672	0.356999	0.3496
rs12702463	7	5998548	G	C	0.196384	0.103637	0.0628222	0.175846	0.13765	0.138206	0.0714
rs6949598	7	5998852	G	A	0.23101	0.107096	0.0625401	0.177821	0.139336	0.138797	0.1239
rs569676084	7	5998989	CA	C	0.743416	0.693266	0.816187	0.678232	0.735212	0.72018	0.3191
rs183113848	7	5999635	T	G	0.00768427	0.0139686	0.000325309	0.0567791	0.0473291	0.0129461	0.0611
rs79245786	7	5999753	A	C	0.0164181	0.0478216	0.0644544	0.0784089	0.0288766	0.10785	0.0524
rs58026649	7	5999898	T	C	0.0201504	0.0623807	0.356046	0.093762	0.0420901	0.170395	0.0602
rs13245536	7	6000310	G	T	0.226468	0.10511	0.0627817	0.173479	0.137805	0.133113	0.1483
rs2345059	7	6000856	T	G	0.0422287	0.170128	0.310378	0.12488	0.16614	0.194335	0.125
rs2345058	7	6001000	A	C	0.202636	0.351175	0.372429	0.345158	0.413267	0.353851	0.4209
rs34197105	7	6001466	A	G	0.251148	0.142028	0.0631037	0.189137	0.173698	0.15508	0.0815
rs137920055	7	6001541	T	C	0.095432	0.116366	0.0345269	0.0795368	0.109045	0.0394218	0.0958
rs12702464	7	6001875	T	C	0.248068	0.139485	0.0617402	0.184022	0.173698	0.153618	0.0704
rs10951972	7	6002187	G	A	0.202972	0.351263	0.367308	0.345118	0.413266	0.354263	0.4551
rs10951973	7	6002205	T	A	0.202028	0.349903	0.372347	0.341925	0.412988	0.353156	0.4536
rs145874235	7	6004333	CTG	C	0.321613	0.181095	0.172226	0.255528	0.223685	0.236358	0.1229
rs77314273	7	6004797	G	A	0.0121244	0.0379468	0	0.0196657	0.0653975	0.0444371	0.0638
rs6978310	7	6004890	T	G	0.323894	0.186028	0.172215	0.271668	0.241779	0.239947	0.2209
rs12538339	7	6005019	T	C	0.832121	0.735073	0.922855	0.791377	0.807704	0.808581	0.69
rs7797466	7	6007152	G	A	0.315281	0.148509	0.163677	0.24917	0.189096	0.216556	0.1564
rs7803118	7	6008555	G	C	0.315126	0.148905	0.163357	0.249808	0.188804	0.221198	0.1866
Chr, chromosome; POS, position; REF, reference; ALT, alternative.

## Sheet: Supplementary table IV
Table SIV. 64 outliers from comparing the allele frequency of variants of the Slovak and non-Finnish populations identified in Lynch syndrome genes.
rs_ID	Chr	POS	REF allele	ALT allele	Allele frequency difference between Slovak and European (non-Finnish) population	Gene	Consequence according to dbSNP NCBI	Clinical significance
rs10173171	2	47431946	G	A	0.185528	MSH2	Intron Variant	Not Reported in ClinVar
rs10194410	2	47449027	C	A	0.110857	MSH2	Intron Variant	Not Reported in ClinVar
rs113323112	2	47654929	G	C	0.232014	None	None	Not Reported in ClinVar
rs58679426	2	47659552	T	C	0.288354	None	None	Not Reported in ClinVar
rs13008932	2	47721757	C	T	0.387664	None	None	Not Reported in ClinVar
rs28876209	2	47744591	T	A	0.267083	None	None	Not Reported in ClinVar
rs6791557	3	30614676	G	A	0.116807	TGFBR2	Missense Variant	Not Reported in ClinVar
rs6770400	3	30615883	A	T	0.116604	TGFBR2	Intron Variant	Not Reported in ClinVar
rs1991657	3	30616539	C	T	0.102918	TGFBR2	Intron Variant	Not Reported in ClinVar
rs58965035	3	30647148	C	T	0.119629	TGFBR2	Intron Variant	Not Reported in ClinVar
rs9850982	3	30669801	G	T	0.100708	TGFBR2	Intron Variant	Not Reported in ClinVar
rs10235277	7	5996614	C	T	0.137355	PMS2	Intron Variant	Not Reported in ClinVar
rs75745061	7	5998084	T	G	0.117138	PMS2	Intron Variant	Not Reported in ClinVar
rs74189692	7	5998092	T	G	0.112523	PMS2	Intron Variant	Not Reported in ClinVar
rs4550710	2	47363136	T	C	-0.160424	None	None	Not Reported in ClinVar
rs12992458	2	47364988	A	G	-0.144084	None	None	Not Reported in ClinVar
rs4952885	2	47366385	G	A	-0.169225	None	None	Not Reported in ClinVar
rs7584126	2	47420838	G	A	-0.218559	MSH2	Intron Variant	Not Reported in ClinVar
rs2081485	2	47426221	T	C	-0.204837	MSH2	Intron Variant	Not Reported in ClinVar
rs2081484	2	47426360	G	A	-0.142712	MSH2	Intron Variant	Not Reported in ClinVar
rs7593412	2	47435589	A	G	-0.228007	MSH2	Intron Variant	Not Reported in ClinVar
rs6704794	2	47450480	A	G	-0.229207	MSH2	Intron Variant	Not Reported in ClinVar
rs397706237	2	47452946	GCA	G	-0.171966	MSH2	Intron Variant	Not Reported in ClinVar
rs11686238	2	47583845	G	T	-0.339076	MSH2	Intron Variant	Not Reported in ClinVar
rs4952891	2	47584699	C	T	-0.218278	MSH2	Intron Variant	Not Reported in ClinVar
rs11125145	2	47590322	C	A	-0.208983	MSH2	Intron Variant	Not Reported in ClinVar
rs2348095	2	47591016	T	G	-0.230314	MSH2	Intron Variant	Not Reported in ClinVar
rs4953508	2	47591489	A	G	-0.196067	MSH2	Intron Variant	Not Reported in ClinVar
rs4953515	2	47602339	G	A	-0.285455	MSH2	Intron Variant	Not Reported in ClinVar
rs11125147	2	47619675	G	A	-0.165576	MSH2	Intron Variant	Not Reported in ClinVar
rs139771520	2	47622951	C	CT	-0.259165	MSH2	Intron Variant	Not Reported in ClinVar
rs796077997	2	47624777	AT	A	-0.184568	MSH2	Intron Variant	Not Reported in ClinVar
rs11679268	2	47646031	A	T	-0.343863	None	None	Not Reported in ClinVar
rs141410543	2	47654920	TC	T	-0.203822	None	None	Not Reported in ClinVar
rs2881862	2	47715514	A	G	-0.336045	None	None	Not Reported in ClinVar
rs61637835	2	47716309	G	A	-0.268579	None	None	Not Reported in ClinVar
rs4953523	2	47716488	C	T	-0.243012	None	None	Not Reported in ClinVar
rs35207134	2	47720811	T	TAAAC	-0.286813	None	None	Not Reported in ClinVar
rs797699	2	47721137	G	A	-0.221691	None	None	Not Reported in ClinVar
rs797698	2	47721143	T	C	-0.181201	None	None	Not Reported in ClinVar
rs560333861	2	47721169	A	AT	-0.154411	None	None	Not Reported in ClinVar
rs797693	2	47721751	T	C	-0.168294	None	None	Not Reported in ClinVar
rs536261356	2	47721897	C	CG	-0.146177	None	None	Not Reported in ClinVar
rs34001741	2	47725837	AT	A	-0.327617	None	None	Not Reported in ClinVar
rs34688839	2	47726003	TA	T	-0.168225	None	None	Not Reported in ClinVar
rs330796	2	47726311	A	T	-0.45978	None	None	Not Reported in ClinVar
rs398080228	2	47780697	TA	T	-0.249549	None	None	Not Reported in ClinVar
rs3136250	2	47786509	G	A	-0.241843	MSH6	Intron Variant	Not Reported in ClinVar
rs7644802	3	30622829	G	A	-0.149651	TGFBR2	Intron Variant	Not Reported in ClinVar
rs6804281	3	30624048	C	A	-0.156877	TGFBR2	Intron Variant	Not Reported in ClinVar
rs13079374	3	30645590	T	A	-0.210337	TGFBR2	Intron Variant	Not Reported in ClinVar
rs57328659	3	30647668	A	AATT	-0.155639	TGFBR2	Intron Variant	Not Reported in ClinVar
rs7613040	3	30647811	T	G	-0.197216	TGFBR2	Intron Variant	Not Reported in ClinVar
rs1350782	3	30662955	A	G	-0.470865	TGFBR2	Intron Variant, LOC105377016, Non Coding Transcript Variant	Not Reported in ClinVar
rs5847639	3	30666806	AT	A	-0.317487	TGFBR2	Intron Variant	Not Reported in ClinVar
rs6790555	3	30680097	C	T	-0.249677	TGFBR2	Intron Variant	Not Reported in ClinVar
rs59335282	3	37001952	GT	G	-0.249929	MLH1	Intron Variant	Not Reported in ClinVar
rs4647260	3	37013110	T	C	-0.183156	MLH1	Intron Variant	Not Reported in ClinVar
rs11719992	3	37028381	T	G	-0.140388	MLH1	Intron Variant	Not Reported in ClinVar
rs141716664	3	37036708	G	GT	-0.141337	MLH1	Intron Variant	Not Reported in ClinVar
rs7776504	7	5992326	C	T	-0.168948	PMS2	Intron Variant	Not Reported in ClinVar
rs10686447	7	5993429	A	ATGT	-0.16729	PMS2	Intron Variant	Not Reported in ClinVar
rs71524066	7	5996575	G	A	-0.227631	PMS2	Intron Variant	Not Reported in ClinVar
rs569676084	7	5998989	CA	C	-0.416112	PMS2	Intron Variant	Not Reported in ClinVar
Chr, chromosome; POS, position; REF, reference; ALT, alternative.
